# Supplementary material for: Pyrrolizinofluorene-embedded dithiacalixcorrole(1.0.1.1)s
Source: Royal Society of Chemistry journal article supplement (doi:10.1039/d4ob01276c), 2024-01-01
Supplement: d4ob01276c1.pdf [file d4ob01276c1.pdf]

## Pyrrolizinofluorene-embedded Dithiacalixcorrole(1.0.1.1)s

Pooja Varak and Mangalampalli Ravikanth\*

Indian Institute of Technology, Powai, Mumbai, 400076, India, Fax: 91-22-5723480;

Tel: 91-22-5767176; E-mail: [ravikanth@chem.iitb.ac.in](mailto:ravikanth@chem.iitb.ac.in)

### Supporting Information

| Sr. no. | Details                                                                                                                              | Page no. |
|---------|--------------------------------------------------------------------------------------------------------------------------------------|----------|
| 1       | General Experimental Section                                                                                                         | S2-S6    |
| 2       | <b>Figures S1-S24.</b> Characterization (HRMS and NMR) data for compounds <b>7a-c</b> .                                              | S7-S31   |
| 3       | <b>Table S1-S3.</b> X-ray crystallographic data of compound <b>7a</b> .                                                              | S32-S36  |
| 4       | <b>Figure S25-S6.</b> The absorption spectra and redox data of compounds <b>7a-c</b> .                                               | S37-S38  |
| 5       | <b>Table S4.</b> Selected TD-DFT calculated oscillator strengths and compositions of the major electronic transitions of <b>7a</b> . | S39-S40  |
| 6       | <b>Table S5.</b> Cartesian coordinates of the optimized ( $S_0$ ) geometries of the compound <b>7a</b> .                             | S41-S42  |
| 7       | References                                                                                                                           | S43-S44  |

**Materials, methods, instrumentation and computational details.**

All the chemicals used were reagent grade, unless mentioned otherwise. Synthesis of compounds **8**<sup>1</sup> and **9a-c**<sup>2</sup> were carried out by following reported procedure. Purification of compounds were done using silica gel (60–120 and 100–200 mesh size) and basic alumina column chromatographic methods. The <sup>1</sup>H, <sup>13</sup>C and 2D NMR spectra were recorded on Bruker 400 MHz and 500 MHz instruments in CDCl<sub>3</sub>. The frequencies for the <sup>13</sup>C nucleus are 100.06 and 125.77 MHz for 400 MHz and 500 MHz instruments, respectively. Tetramethylsilane [Si (CH<sub>3</sub>)<sub>4</sub>] was used as an internal standard for <sup>1</sup>H and <sup>13</sup>C NMR. Structural assignments were made with additional information from <sup>1</sup>H-<sup>1</sup>H COSY, <sup>1</sup>H-<sup>1</sup>H NOESY, <sup>1</sup>H-<sup>1</sup>H HSQC and <sup>1</sup>H-<sup>1</sup>H HMBC experiments for compound **7a**. Absorption spectra were obtained using Cary series UV–Vis–NIR Spectrophotometer. The solution for absorption studies of compound **7a-c** (4×10<sup>-5</sup> M) were prepared by using a HPLC grade CHCl<sub>3</sub>. HRMS were recorded on Bruker maXis Impact and LC-MS Q-TOF micro mass spectrometer using positive mode ESI methods for acetonitrile/methanol solutions. The electrochemical experiments were carried out in dry dichloromethane using 0.1 M tetrabutylammonium perchlorate (TBAP) as a supporting electrolyte. Cyclic voltammetry (CV) studies were performed with BAS electrochemical system employing the three-electrode configuration consisting of a glassy carbon (working electrode), platinum wire (auxiliary electrode) and saturated calomel (reference electrode) electrodes. Half wave potentials were measured using differential pulse voltammetry (DPV) and also calculated manually by taking the average of cathodic and anodic peak potentials.

**X-ray Crystal Structure Analysis:**

Single crystals for X-ray diffraction were obtained by slow diffusion of CH<sub>3</sub>OH solution over the CH<sub>2</sub>Cl<sub>2</sub> solution of **7a** for four days. Rigaku Saturn 724 diffractometer was used for performing

Single-crystal X-ray structure analysis which comprised of a low-temperature attachment. Data were collected at 100 K using graphite-monochromated MoK $\alpha$  radiation ( $\lambda_{\alpha}$  = 0.71073 Å) by the  $\omega$ -scan technique. The data were reduced using CrysAlisPro Red 171.41\_64.93a software.<sup>3</sup> The structures were solved using Olex2 1.5<sup>4</sup> with the SHELXT<sup>5</sup> structure solution program using intrinsic phasing and refined the with the SHELXL<sup>6</sup> refinement package using least-squares minimization. All non-hydrogen atoms were refined anisotropically. X-ray data for the compound **7a** was collected on a Bruker Kappa CCD diffractometer equipped with a graphite monochromated MoK $\alpha$  radiation source at 200 K using the  $\theta$ – $2\theta$  scan mode. An empirical absorption correction by multi scans was applied and all of the non-hydrogen atoms were refined with anisotropic displacement factors. Hydrogen atoms were placed in ideal positions and fixed with relative isotropic displacement parameters. The corresponding loop of the residual electron voids (from PLATON) was appended in the corresponding CIF file. CCDC no. **2365345** contain supplementary crystallographic data for this paper. These data can be obtained free of charge from The Cambridge Crystallographic Data Centre via [www.ccdc.cam.ac.uk/data\\_request/cif](http://www.ccdc.cam.ac.uk/data_request/cif).

### Computational Details:

All computations were performed using the Gaussian 09 program package. The density functional theory (DFT) method, with hybrid functional B3LYP in conjunction with 6-31G (d,p) basis set was implemented to optimize the geometry of compound **7a** in ground ( $S_0$ ) state.<sup>7</sup> In order to improve the accuracy of electronic structure calculations and geometry optimization in  $S_0$  state, dispersive interactions in the electron density of the macrocycle **7a** were studied using Grimme's dispersion correction method (GD2) over the B3LYP/6-31G (d,p) level of theory.<sup>8</sup> Oscillator strengths were obtained using identical basis and functional hybrid set B3LYP/6-31G (d,p), whereas the vertical excitation energies were obtained by the help of TD-DFT techniques for

$S_0 \rightarrow S_n$  transitions.<sup>9, 10</sup> All computations were performed in toluene medium using the Polarizable Continuum Model (PCM) and Self-Consistent Reaction Field (SCRF). The electronic absorption spectra, and the oscillator strengths were thoroughly examined using time-dependent DFT with the PCM model based on the optimized structures in the  $S_0$  state.

## Experimental Section:

### Pyrrolizinofluorene-embedded bithiacalixcorroles **7a-c**.

To the well-stirred solution of *meso*-fused fluorene-based tripyrrane (0.21 mmol, 1.0 equiv.) **8** in  $\text{CH}_2\text{Cl}_2$  (50 mL) in an inert atmosphere at room temperature, a required amount of appropriate bithiophene diol (0.21 mmol, 1.0 equiv.) **9a/9b/9c** was added, and the resultant mixture was stirred until the bithiophene diol dissolved completely. To initiate condensation, a TFA (0.14 mmol, 0.7 equiv.) was added to reaction mixture and stirred under a nitrogen atmosphere at room temperature for 40 min. The oxidant DDQ (0.52 mmol, 2.5 equiv.) was then added to the reaction mixture and stirred in open air at room temperature for another 45 min. After completion of reaction as indicated by TLC analysis, the solvent was removed on a rotary evaporator under vacuum. The obtained crude compounds were subjected to basic alumina column and eluted with dichloromethane followed by further purification on a basic alumina column chromatography using *n*-hexane/ dichloromethane (95:5) as a mobile phase for the macrocycles **7a-c**. The desired **7a-c** were obtained as pink solids in 4-5% yields.

### Synthesis of compound **7a**

The compound **7a** was synthesized from *meso*-fused fluorene-based tripyrrane (100 mg, 0.21 mmol) **8** and bithiophene diol (90 mg, 0.21 mmol) **9a** by following the general procedure reported above for compounds **7a-c**; pink solid. Yield: 4% (7 mg);  $^1\text{H}$  NMR (500 MHz,  $\text{CDCl}_3$ )  $\delta$  7.92 (s, 1H), 7.71 (d,  $J$  = 7.3 Hz, 2H), 7.53 (t,  $J$  = 7.7 Hz, 2H), 7.47 (d,  $J$  = 8.7 Hz, 2H), 7.37 (d,  $J$  = 3.7

Hz, 1H), 7.35 (d,  $J = 7.4$  Hz, 1H), 7.31 (d,  $J = 5.0$  Hz, 1H), 7.03 (ddd,  $J = 14.2, 8.8, 3.6$  Hz, 8H), 6.96 (d,  $J = 8.7$  Hz, 2H), 6.84 (d,  $J = 7.6$  Hz, 1H), 6.82 (d,  $J = 5.8$  Hz, 1H), 6.76 (d,  $J = 8.7$  Hz, 2H), 6.72 (d,  $J = 3.4$  Hz, 1H), 6.60 (s, 1H), 6.58 (d,  $J = 5.7$  Hz, 1H), 6.55 (d,  $J = 3.7$  Hz, 1H), 5.95 (s, 1H), 5.80 (t,  $J = 2.9$  Hz, 1H), 5.28 (d,  $J = 3.8$  Hz, 1H), 5.17 (t,  $J = 3.01$  Hz, 1H), 5.12 (s, 1H), 4.74 (d,  $J = 3.9$  Hz, 1H), 3.89 (s, 3H), 3.74 (s, 3H).  $^{13}\text{C}\{^1\text{H}\}$  NMR (126 MHz,  $\text{CDCl}_3$ )  $\delta$  159.9, 158.4, 152.2, 149.4, 145.0, 144.4, 143.6, 142.3, 139.9, 139.6, 138.4, 136.6, 135.1, 134.8, 134.0, 133.2, 131.9, 131.8, 130.6, 129.9, 129.4, 129.0, 128.6, 127.6, 126.9, 126.6, 125.5, 124.6, 124.4, 124.3, 120.7, 120.2, 117.3, 115.2, 113.8, 113.6, 112.7, 108.9, 107.0, 105.5, 55.5, 55.3, 52.9, 44.4, 43.2. HR-MS (ESI-TOF): Calcd. for  $\text{C}_{57}\text{H}_{40}\text{N}_2\text{O}_2\text{S}_3$   $[\text{M}]^+$   $m/z$  880.2246; Found  $[\text{M}]^+$   $m/z$  880.2213.

### Synthesis of compound **7b**

The compound **7b** was synthesized from *meso*-fused fluorene-based tripyrrane (100 mg, 0.21 mmol) **8** and appropriate bithiophene diol (84 mg, 0.21 mmol) **9b** by following the general procedure reported above for compounds **7b-c**; pink solid. Yield: 5% (8 mg);  $^1\text{H}$  NMR (500 MHz,  $\text{CDCl}_3$ )  $\delta$  7.94 (s, 1H), 7.73 (d,  $J = 7.2$  Hz, 2H), 7.55 (t,  $J = 7.7$  Hz, 2H), 7.46 (d,  $J = 8.0$  Hz, 2H), 7.38 (dd,  $J = 8.4, 5.1$  Hz, 2H), 7.34 (d,  $J = 5.1$  Hz, 1H), 7.26 (d,  $J = 7.9$  Hz, 2H), 7.08 (d,  $J = 3.7$  Hz, 1H), 7.04 (dt,  $J = 9.1, 4.9$  Hz, 8H), 6.99 (dd,  $J = 11.1, 4.8$  Hz, 1H), 6.87 (d,  $J = 7.5$  Hz, 1H), 6.84 (d,  $J = 5.7$  Hz, 1H), 6.74 (d,  $J = 3.4$  Hz, 1H), 6.63 (s, 1H), 6.61 (d,  $J = 5.7$  Hz, 1H), 6.57 (d,  $J = 3.6$  Hz, 1H), 5.98 (s, 1H), 5.82 (t,  $J = 2.9$  Hz, 1H), 5.30 (d,  $J = 3.7$  Hz, 1H), 5.20 (t,  $J = 2.7$  Hz, 1H), 5.15 (s, 1H), 4.76 (d,  $J = 3.9$  Hz, 1H), 2.46 (s, 3H), 2.30 (s, 3H).  $^{13}\text{C}\{^1\text{H}\}$  NMR (101 MHz,  $\text{CDCl}_3$ )  $\delta$  152.1, 149.4, 144.9, 144.4, 143.6, 142.2, 140.4, 139.6, 138.6, 138.4, 138.3, 138.0, 136.7, 136.6, 136.4, 135.2, 134.7, 133.9, 132.0, 131.8, 130.6, 129.8, 129.1, 129.0, 128.9, 128.6, 128.3, 127.6, 126.9, 126.6, 125.7, 125.6, 124.6, 124.4, 124.3, 120.8, 120.7, 120.2, 117.5, 115.2, 112.9,

108.9, 107.0, 105.5, 52.9, 44.8, 43.2, 21.4, 21.1. HR-MS (ESI-TOF): Calcd. for  $C_{57}H_{41}N_2S_3$   $[M+H]^+$  m/z 849.2413; Found  $[M+H]^+$  m/z 849.2426.

### Synthesis of compound **7c**

The compound **7c** was synthesized from *meso*-fused tripyrrane (100 mg, 0.21 mmol) **8** and appropriate bithiophene diol (102 mg, 0.21 mmol) **9c** by following the general procedure reported above for compounds **7a-c**; pink solid. Yield: 4% (8 mg);  $^1H$  NMR (500 MHz,  $CDCl_3$ )  $\delta$  7.92 (s, 1H), 7.71 (d,  $J = 7.6$  Hz, 2H), 7.53 (t,  $J = 7.6$  Hz, 2H), 7.45 (dd,  $J = 21.2, 8.2$  Hz, 4H), 7.38 – 7.34 (m, 2H), 7.31 (d,  $J = 5.0$  Hz, 1H), 7.24 (s,  $J = 8.2$  Hz, 2H), 7.02 (m, 8H), 6.85 (d,  $J = 7.5$  Hz, 1H), 6.81 (d,  $J = 5.7$  Hz, 1H), 6.72 (s, 1H), 6.63 (d,  $J = 5.7$  Hz, 1H), 6.60 (s, 1H) 6.55 (d,  $J = 3.3$  Hz, 1H), 5.96 (s, 1H), 5.79 (t,  $J = 2.8$  Hz, 1H), 5.27 (d,  $J = 3.3$  Hz, 1H), 5.20 (s, 1H), 5.12 (s, 1H), 4.74 (d,  $J = 3.4$  Hz, 1H), 1.39 (s, 9H), 1.25 (s, 9H).  $^{13}C\{^1H\}$  NMR (101 MHz,  $CDCl_3$ )  $\delta$  152.1, 151.4, 149.6, 149.5, 145.0, 144.4, 143.6, 142.1, 140.5, 139.6, 138.5, 137.9, 136.7, 135.3, 134.7, 133.9, 132.1, 131.8, 131.6, 130.7, 129.8, 129.0, 128.6, 128.0, 127.6, 126.9, 126.6, 125.7, 125.5, 125.2, 125.19, 124.6, 124.4, 124.3, 120.7, 120.7, 120.3, 117.5, 115.2, 114.2, 112.9, 108.9, 107.0, 105.6, 52.9, 44.8, 43.3, 31.5. HR-MS (ESI-TOF): Calcd. for  $C_{63}H_{53}N_2S_3$   $[M+H]^+$  m/z 955.3355; Found  $[M+H]^+$  m/z 933.3355.

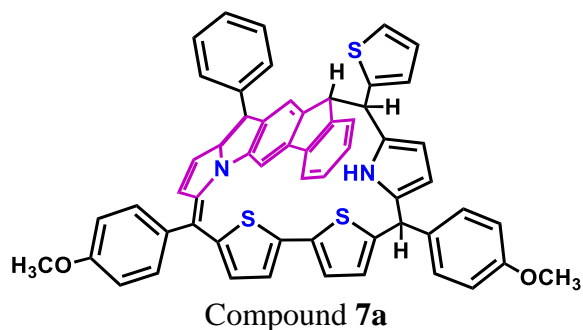

DEPARTMENT OF CHEMISTRY, I.I.T.(B)

#### Analysis Info

Analysis Name D:\Data\MAR-24\MR-PV-FLU-Ph.d  
 Method Naformat\_pos\_1500.m  
 Sample Name MR-PV-FLU-Ph  
 Comment C57H40N2O2S3

Acquisition Date 3/18/2024 3:53:56 PM

Operator iitb  
 Instrument maXis impact 282001.00081

#### Acquisition Parameter

Source Type ESI  
 Focus Not active  
 Scan Begin 100 m/z  
 Scan End 1500 m/z

Ion Polarity Positive  
 Set Capillary 3700 V  
 Set End Plate Offset -500 V  
 Set Charging Voltage 2000 V  
 Set Corona 0 nA

Set Nebulizer 0.3 Bar  
 Set Dry Heater 180 °C  
 Set Dry Gas 4.0 l/min  
 Set Divert Valve Source  
 Set APCI Heater 0 °C

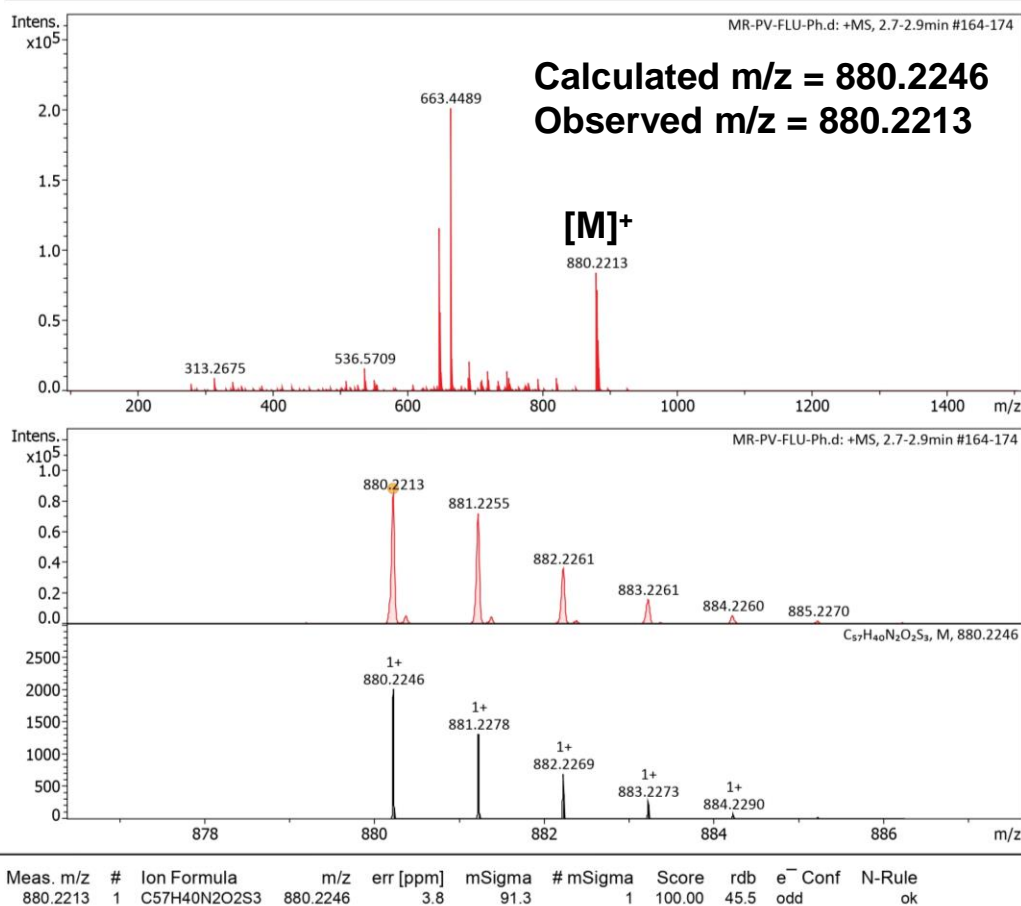

**Figure S1.** HR mass spectrum of the compound **7a**.

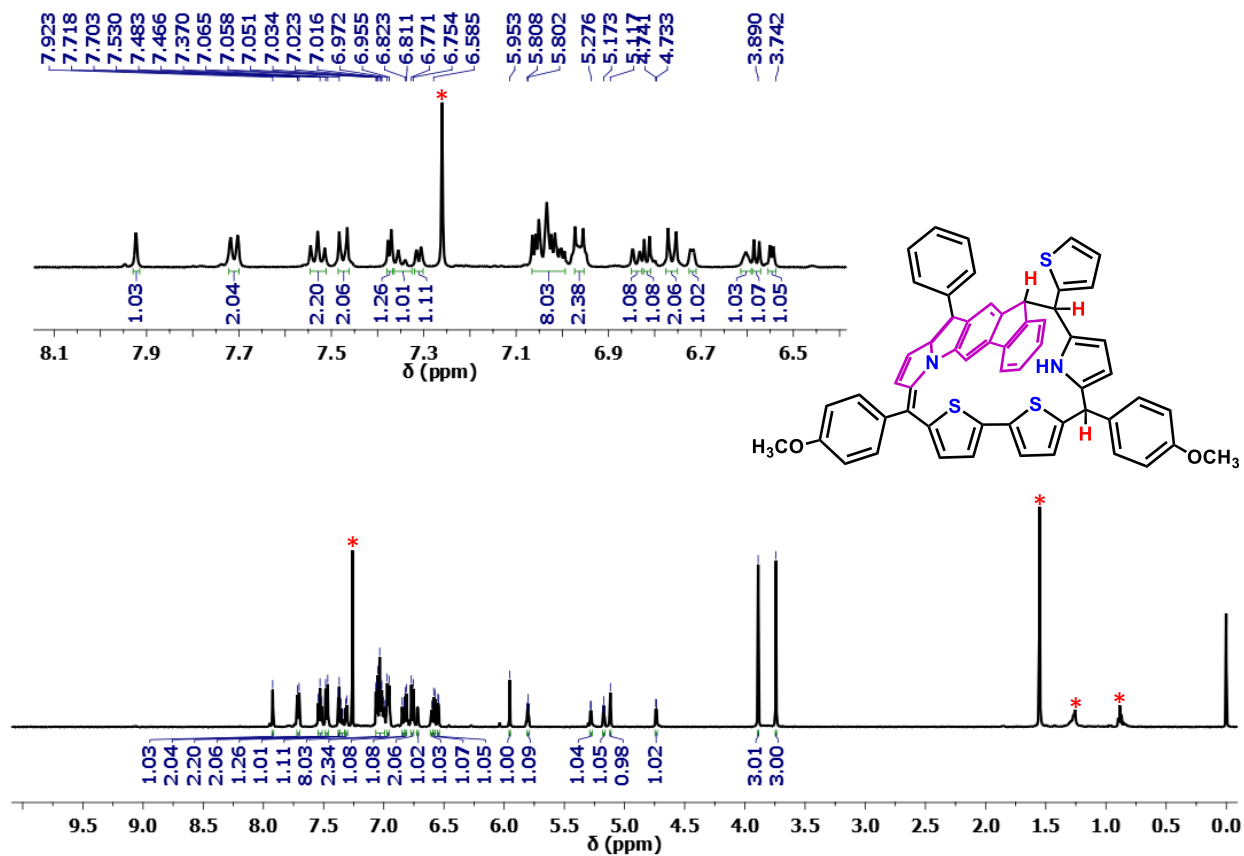

**Figure S2.**  $^1\text{H}$ -NMR spectrum of the compound **7a** recorded in  $\text{CDCl}_3$  on 500 MHz NMR instrument. Note: Peaks marked with asterisk (\*) are due to residual solvents.

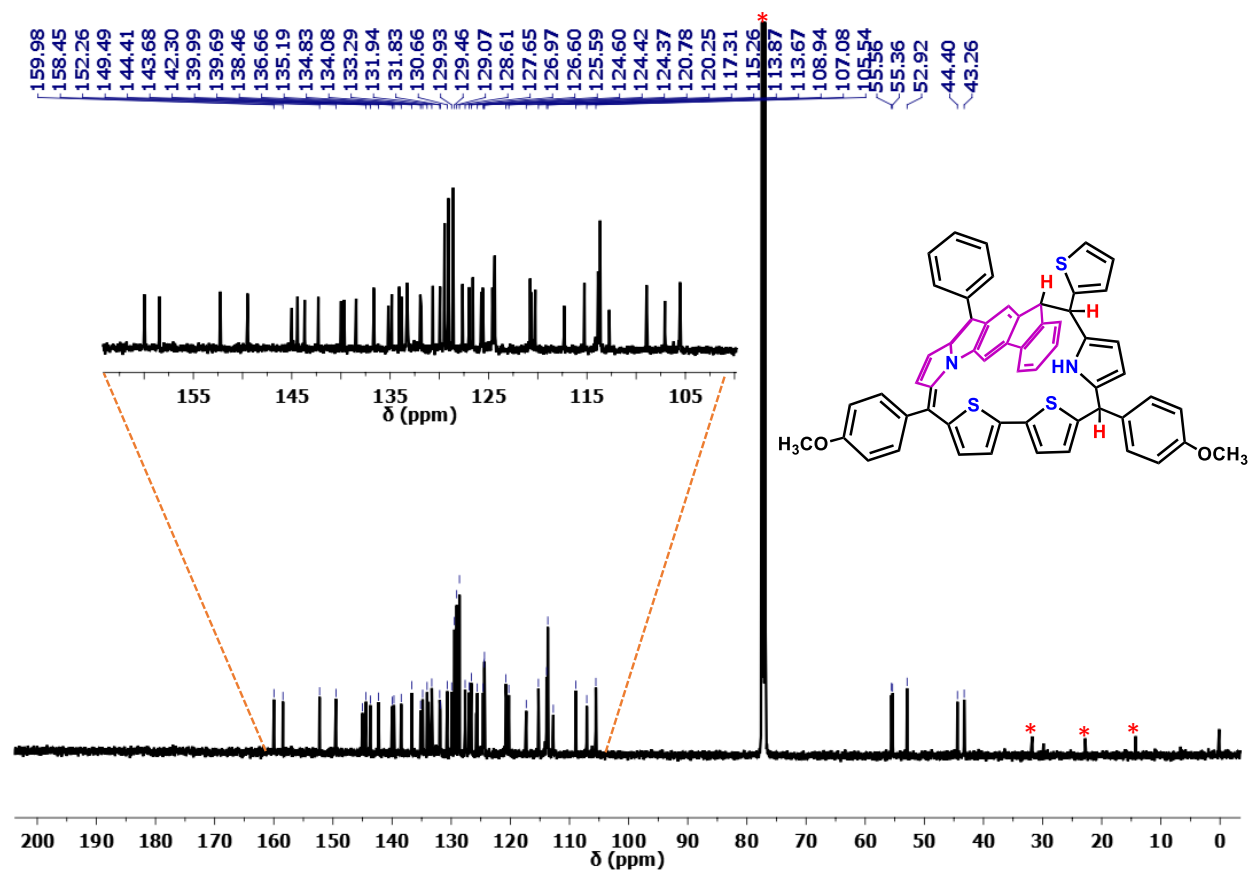

**Figure S3.**  $^{13}\text{C}$  NMR spectrum of the compound **7a** recorded in  $\text{CDCl}_3$  on 126 MHz NMR instrument. Note: Peaks marked with asterisk (\*) are due to residual solvents.

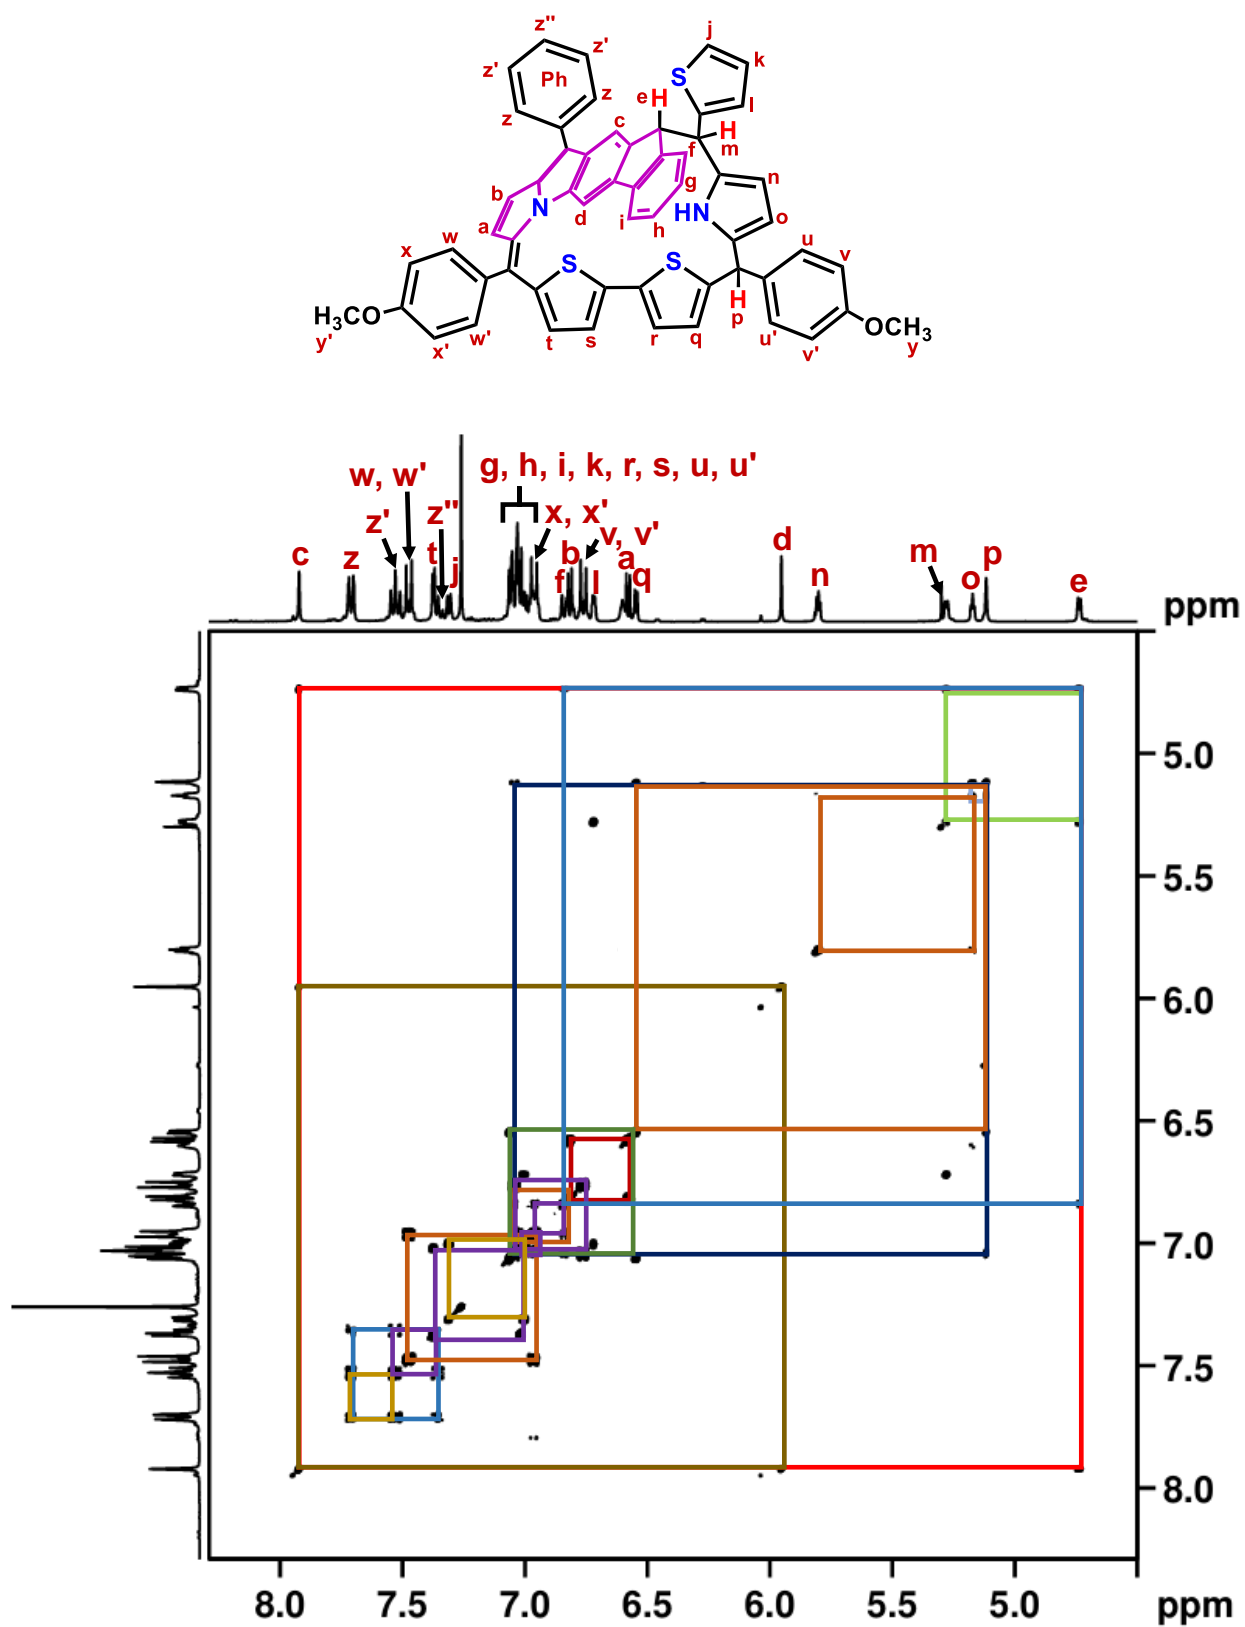

Figure S4. Partial  $^1\text{H}$ - $^1\text{H}$  COSY of compound **7a** recorded in  $\text{CDCl}_3$  at 25  $^\circ\text{C}$ .

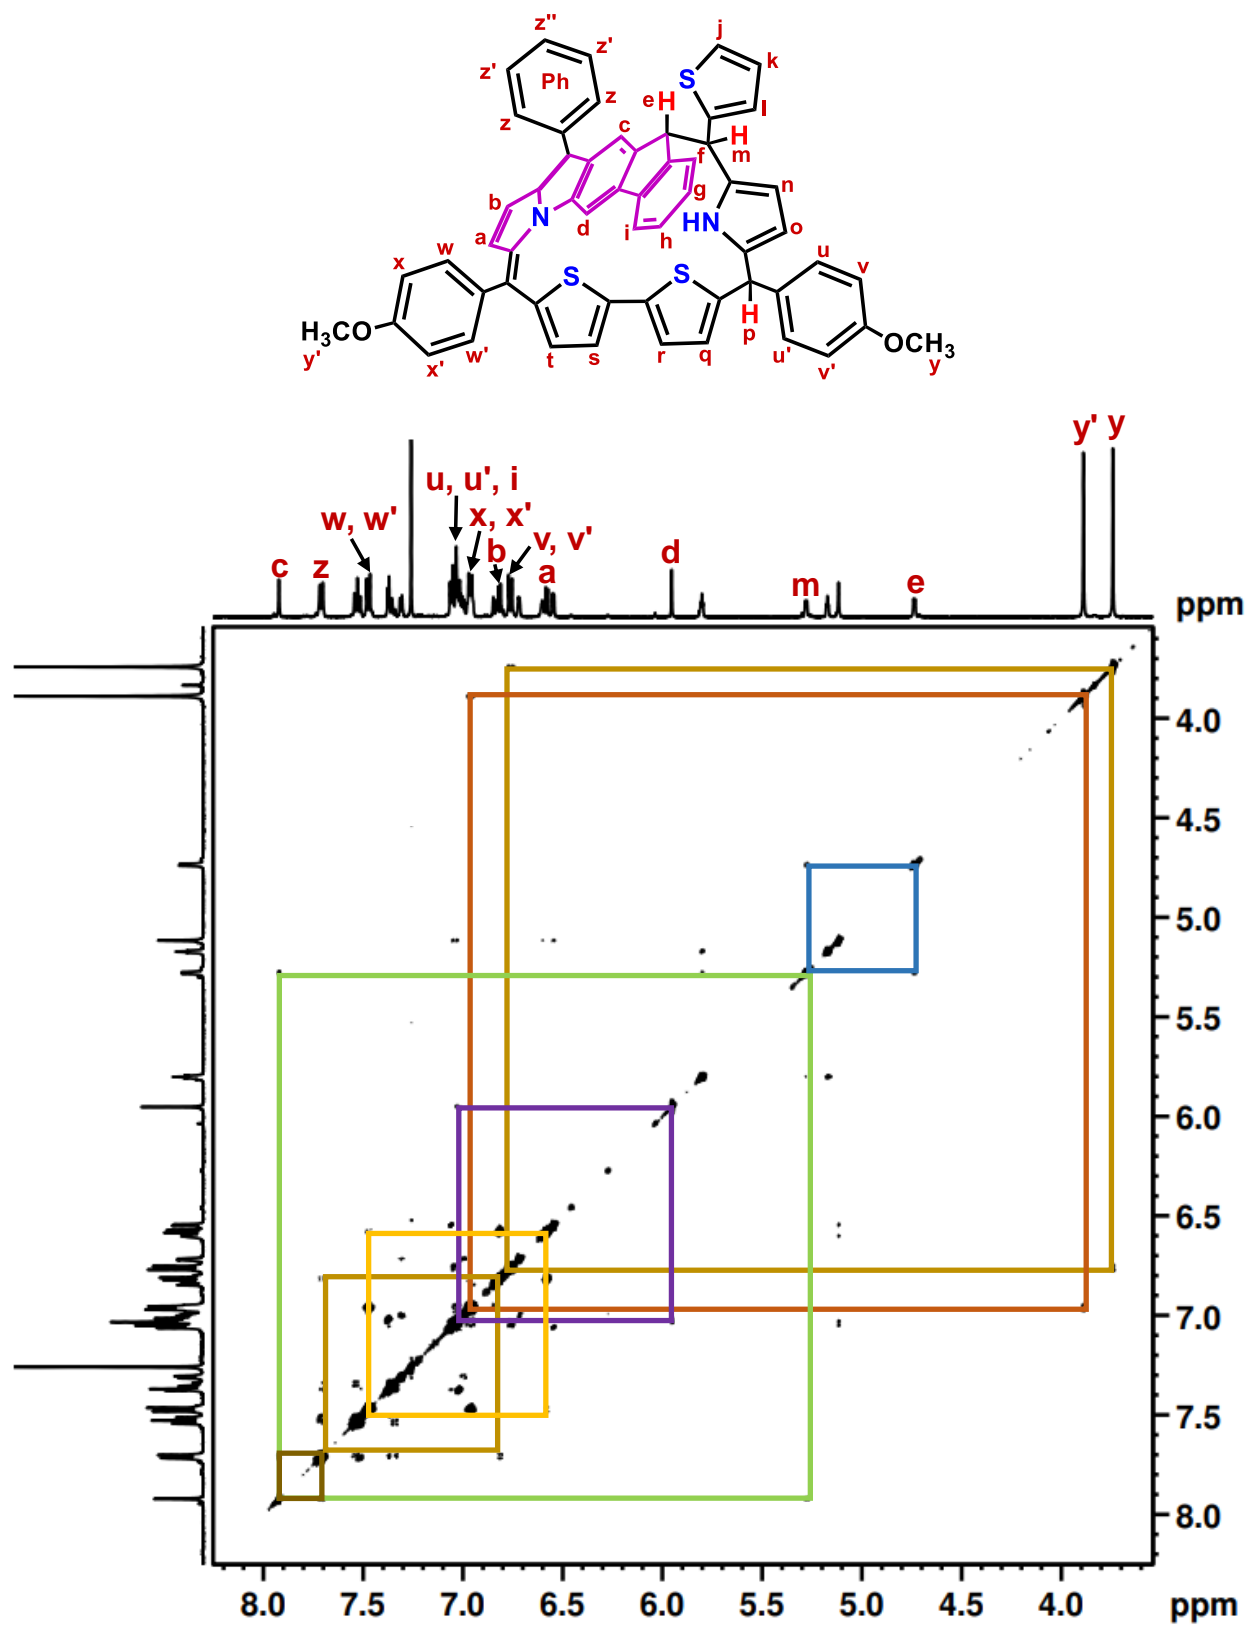

Figure S5.  $^1\text{H}$ - $^1\text{H}$  NOESY of compound **7a** recorded in  $\text{CDCl}_3$  at 25  $^\circ\text{C}$ .

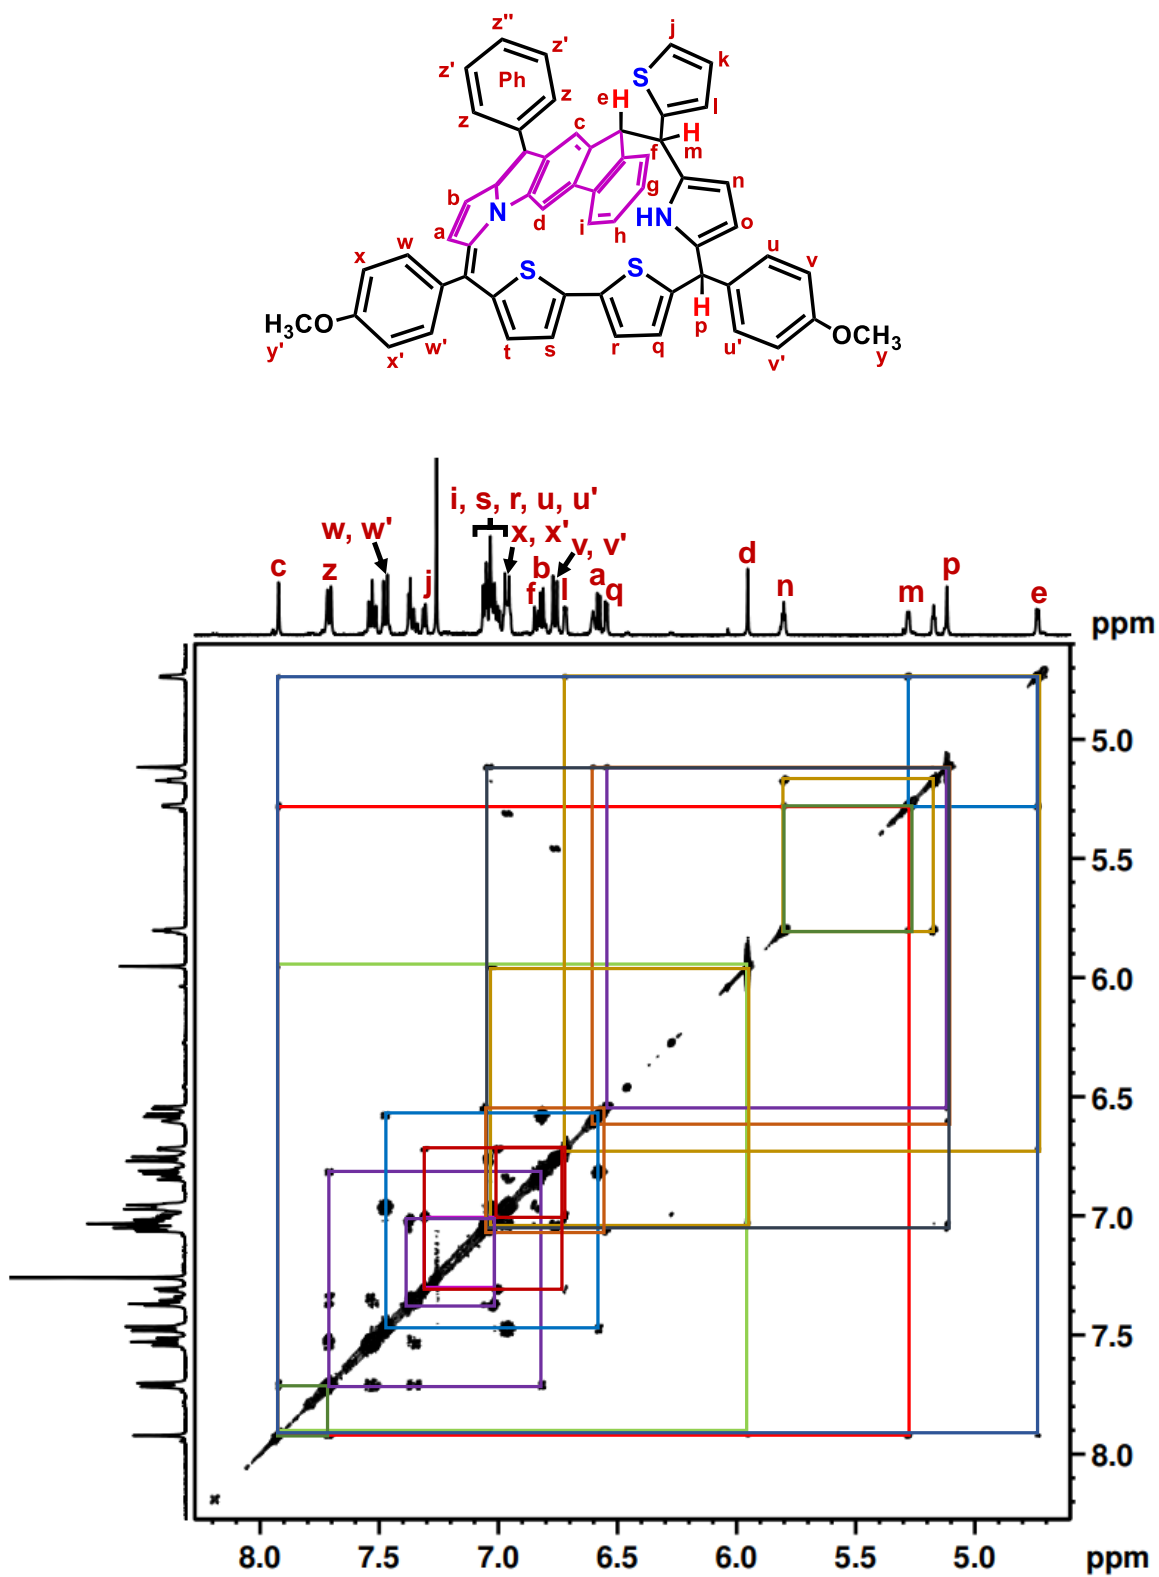

**Figure S6.** Expanded  $^1\text{H}$ - $^1\text{H}$  NOESY of compound **7a** recorded in  $\text{CDCl}_3$  at 25 °C.

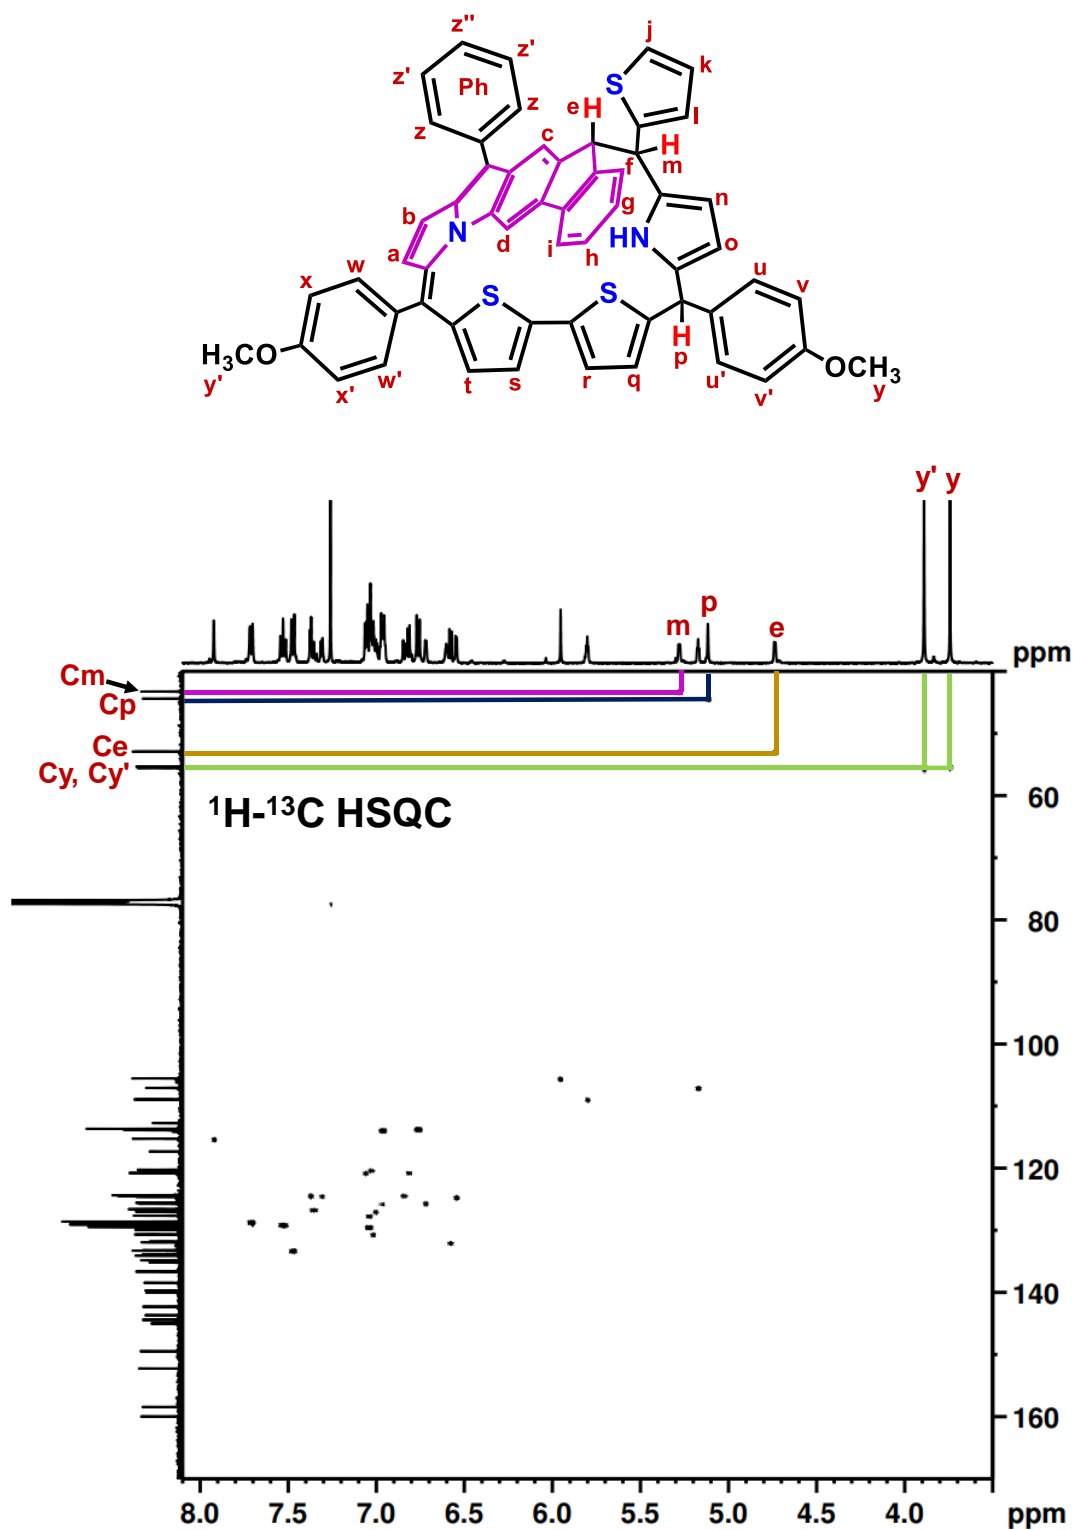

Figure S7.  $^1\text{H}$ - $^{13}\text{C}$  HSQC of compound **7a** recorded in  $\text{CDCl}_3$  at 25  $^\circ\text{C}$ .

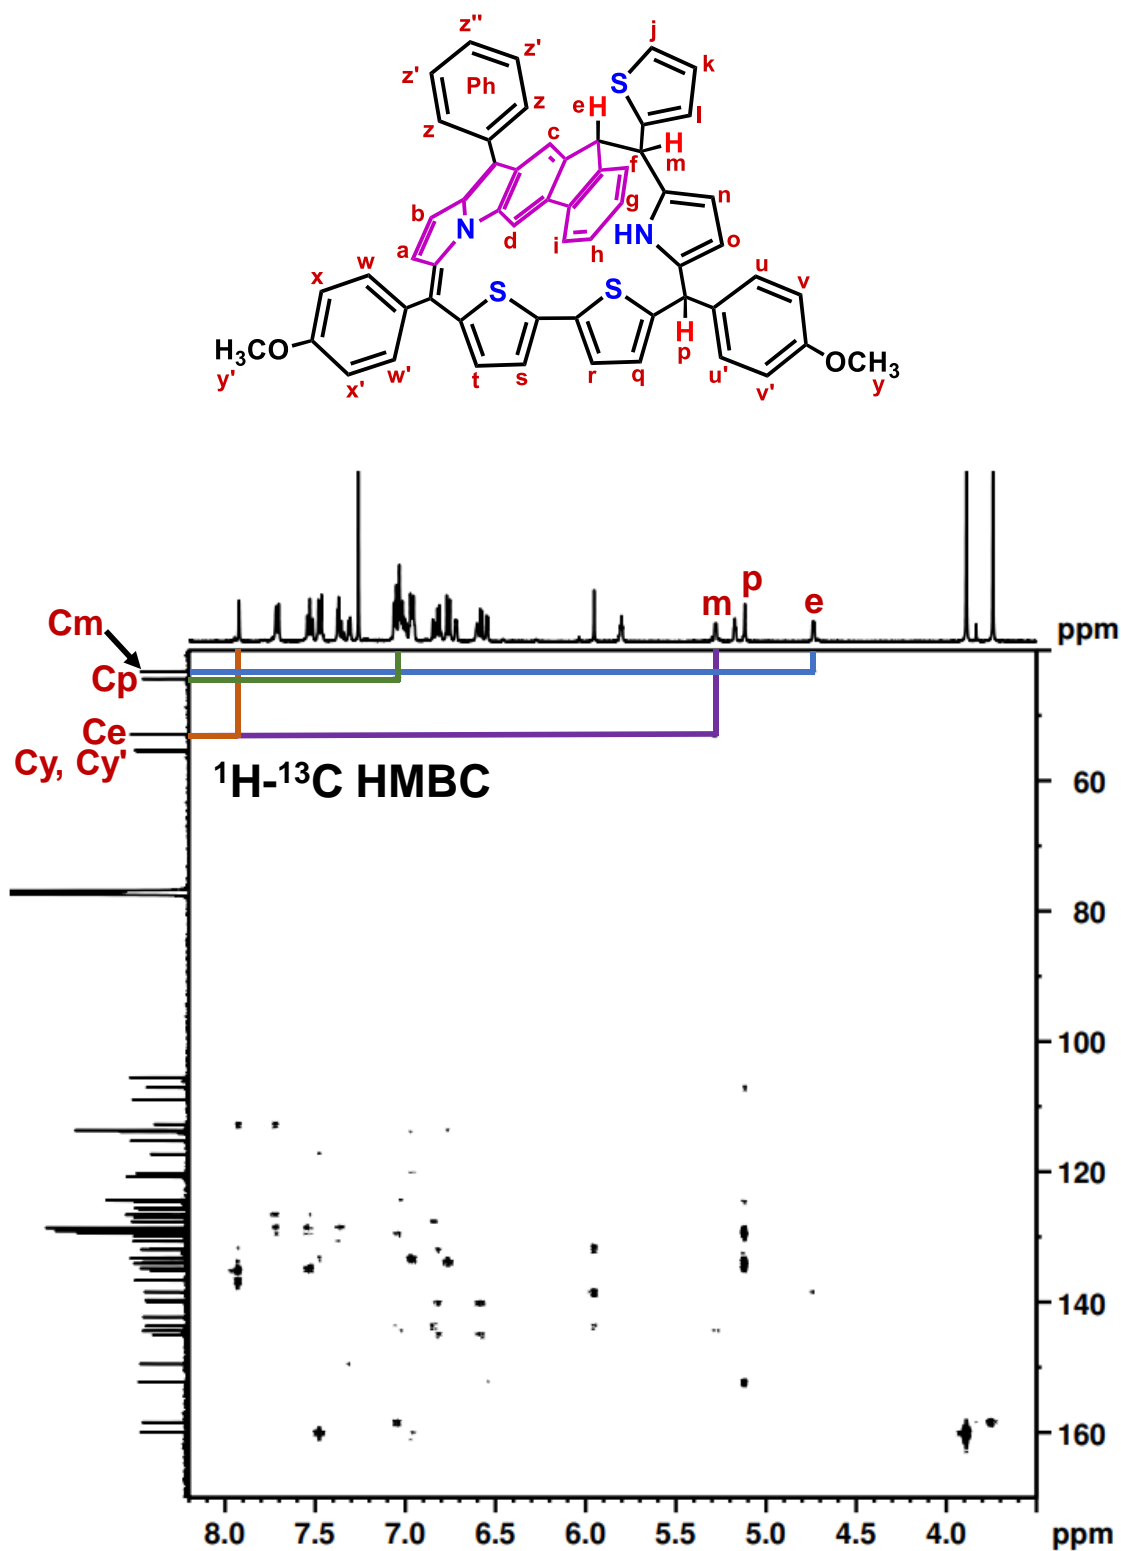

Figure S8.  $^1\text{H}$ - $^{13}\text{C}$  HMBC of compound **7a** recorded in  $\text{CDCl}_3$  at 25 °C.

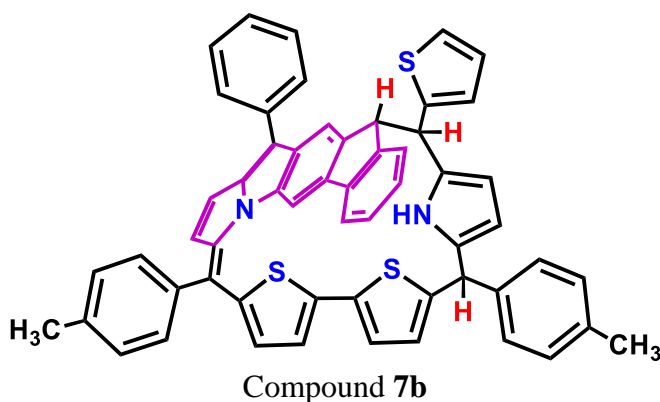

DEPARTMENT OF CHEMISTRY, I.I.T.(B)

**Analysis Info**

Analysis Name D:\Data\APR-24\MR-PV-TOL-SPOT-1.d  
 Method Naformat\_pos\_1500.m  
 Sample Name MR-PV-TOL-SPOT-1  
 Comment C57H40N2S3

Acquisition Date 4/18/2024 11:02:29 AM

Operator iitb  
 Instrument maXis impact 282001.00081

**Acquisition Parameter**

Source Type ESI  
 Focus Not active  
 Scan Begin 100 m/z  
 Scan End 1500 m/z

Ion Polarity Positive  
 Set Capillary 3700 V  
 Set End Plate Offset -500 V  
 Set Charging Voltage 2000 V  
 Set Corona 0 nA

Set Nebulizer 0.3 Bar  
 Set Dry Heater 180 °C  
 Set Dry Gas 4.0 l/min  
 Set Divert Valve Source  
 Set APCI Heater 0 °C

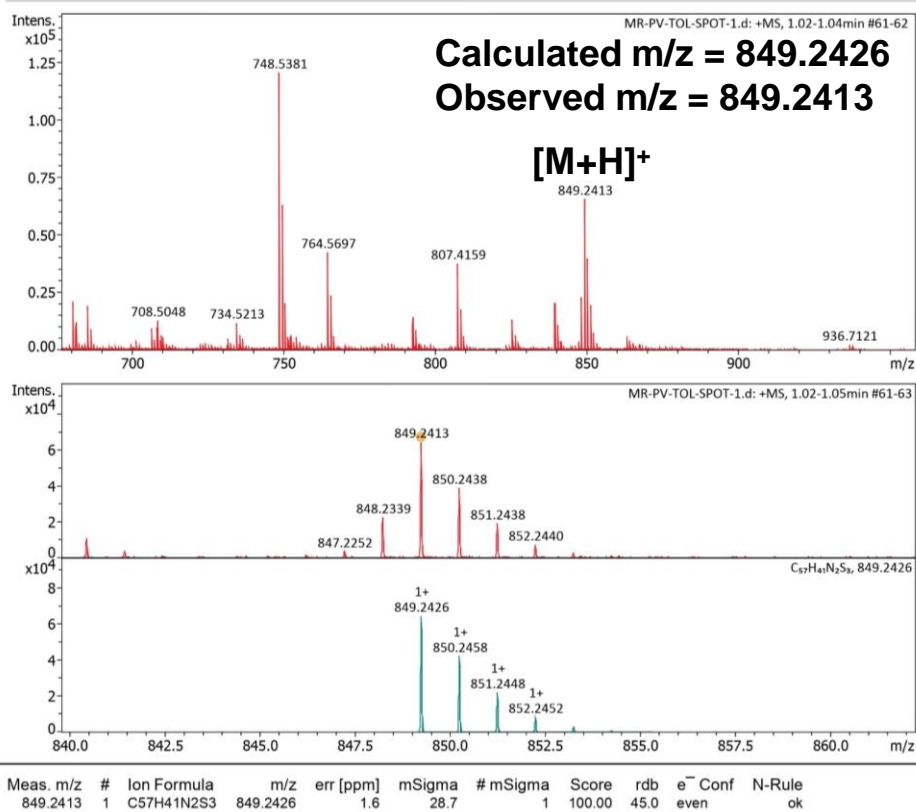

**Figure S9.** HR mass spectrum of the compound **7b**.

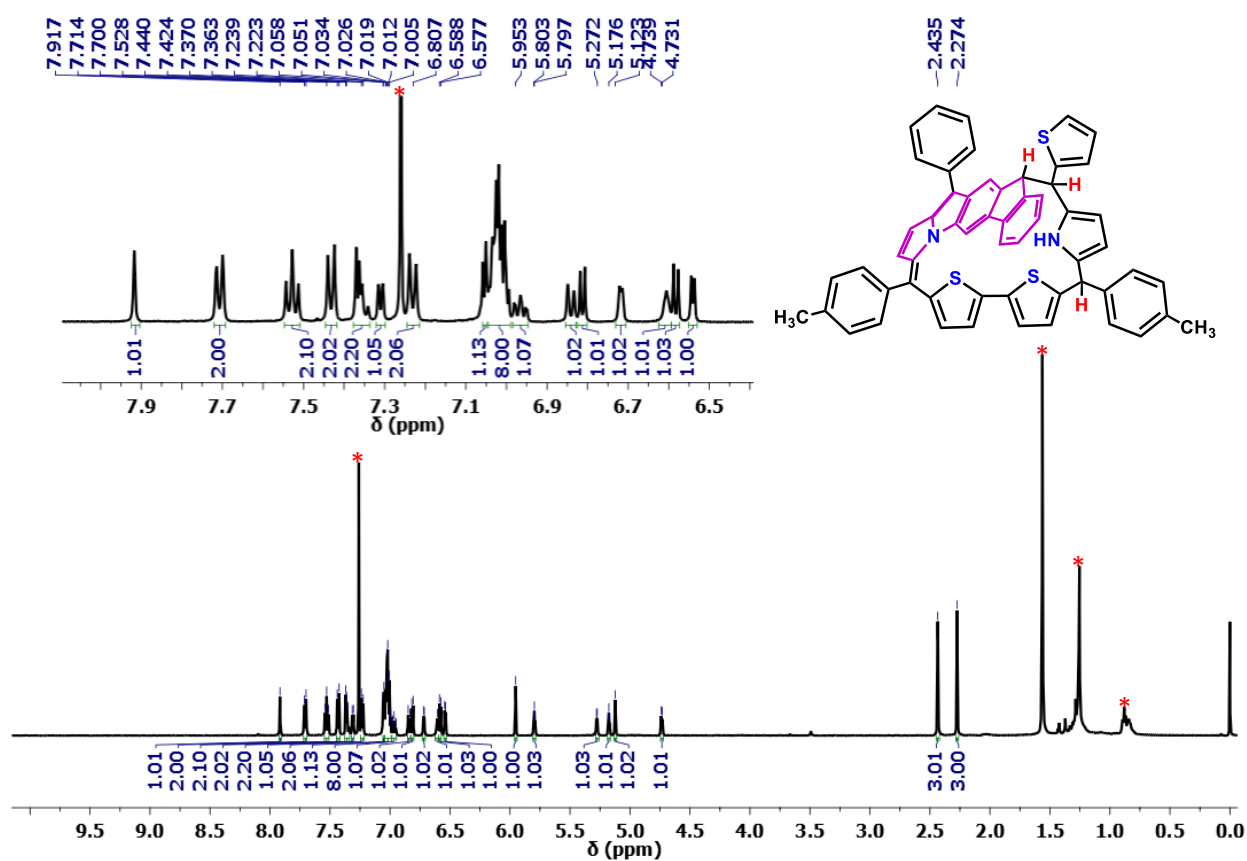

**Figure S10.** <sup>1</sup>H-NMR spectrum of the compound **7b** recorded in CDCl<sub>3</sub> on 400 MHz NMR instrument. Note: Peaks marked with asterisk (\*) are due to residual solvents.

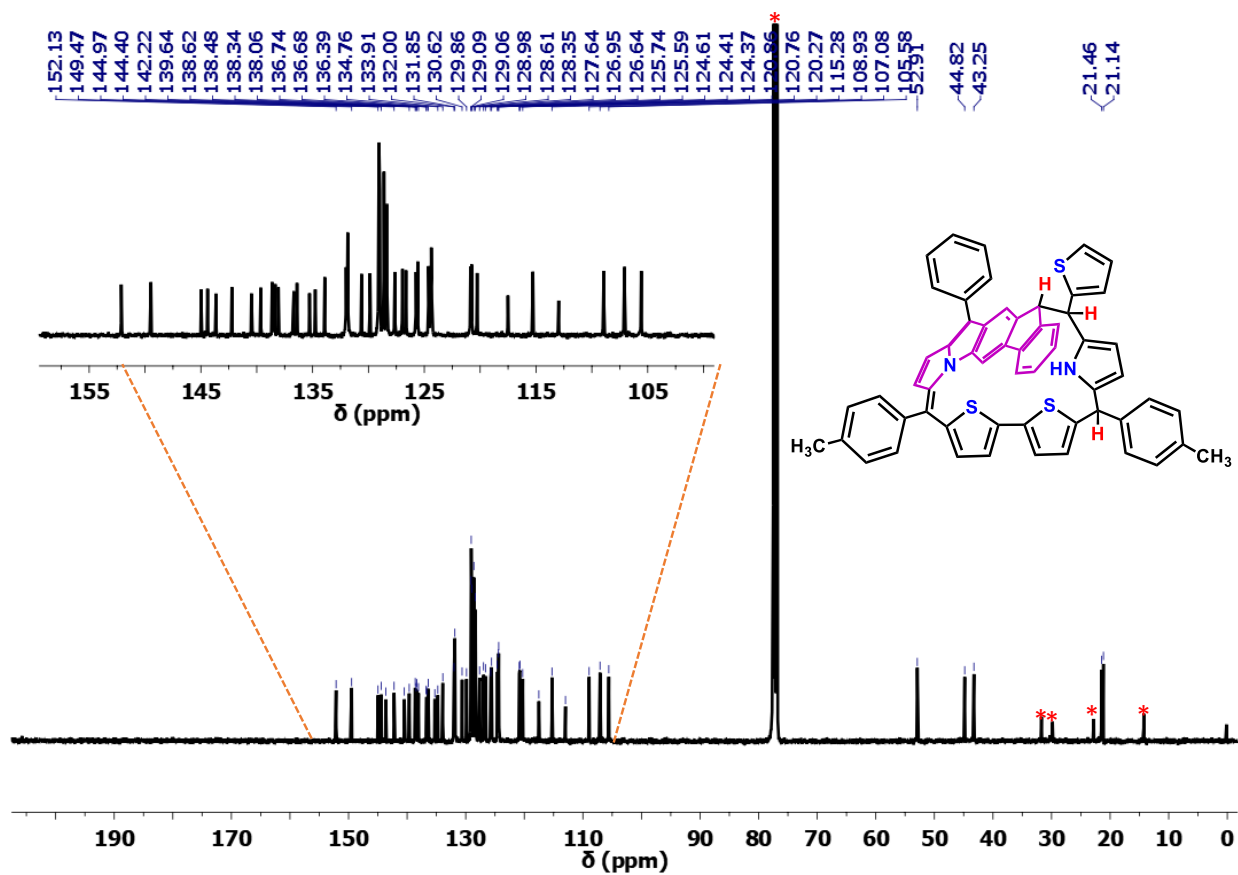

**Figure S11.**  $^{13}C$  NMR spectrum of the compound **7b** recorded in  $CDCl_3$  on 101 MHz NMR instrument. Note: Peaks marked with asterisk (\*) are due to residual solvents.

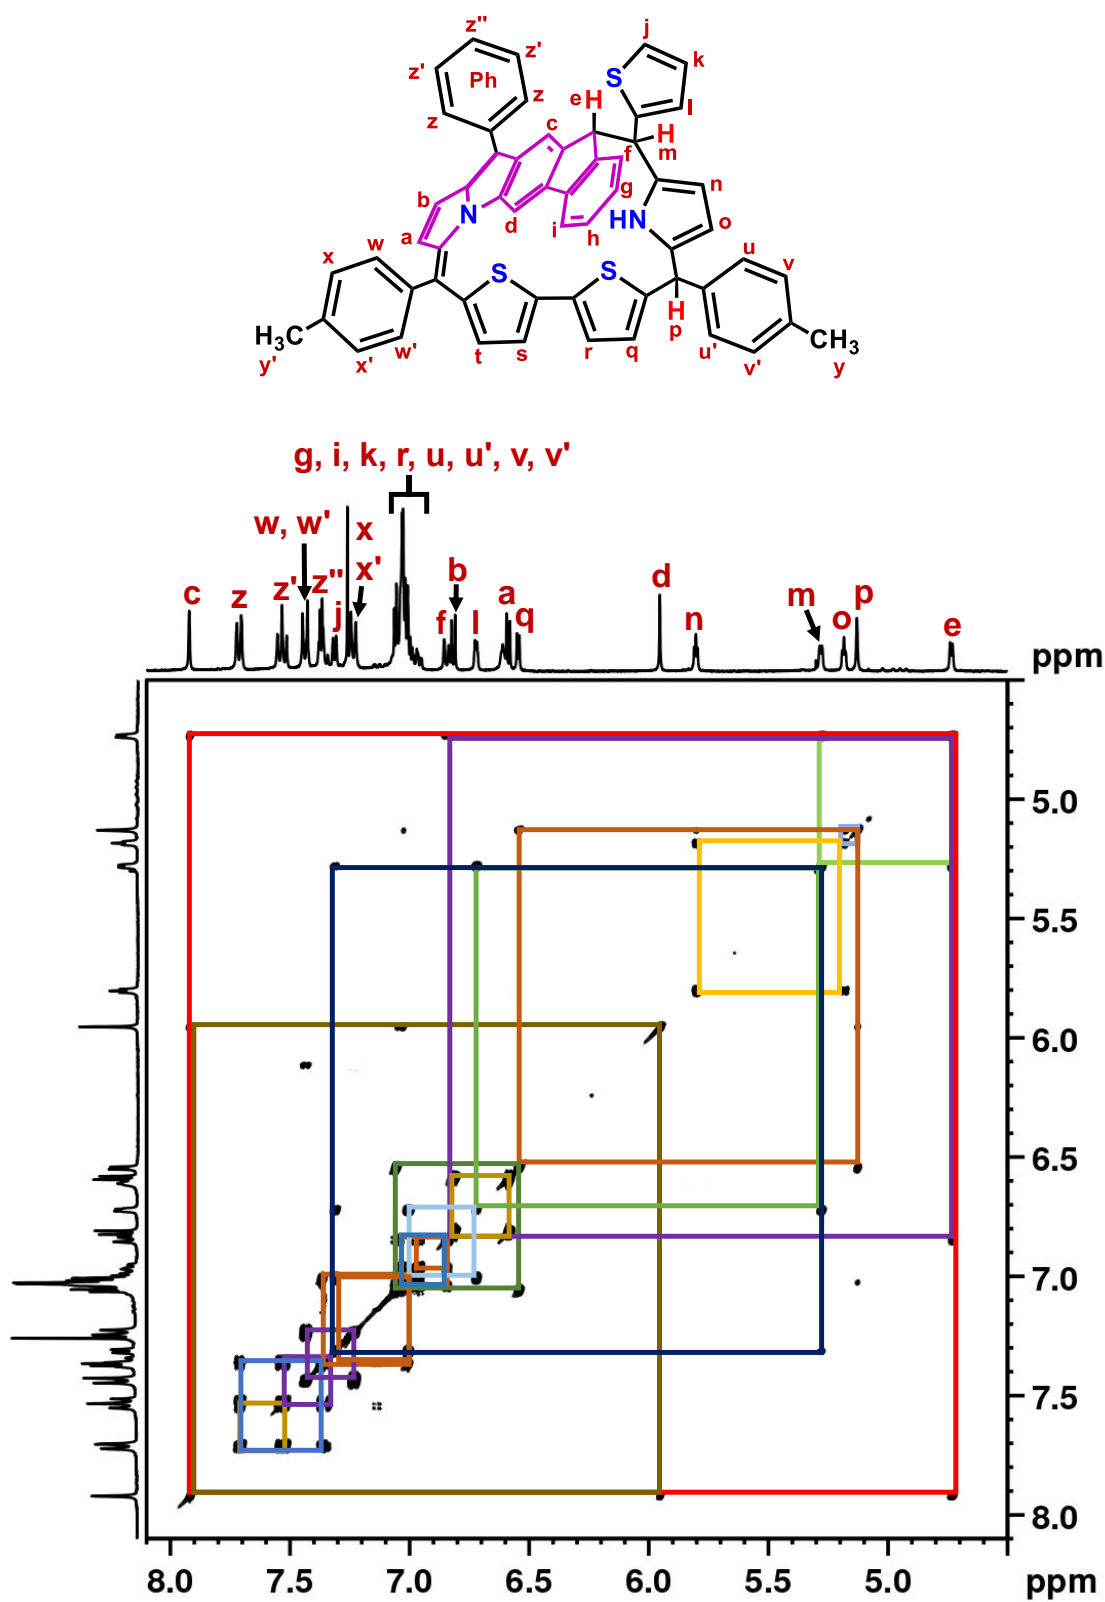

Figure S12. Partial  $^1\text{H}$ - $^1\text{H}$  COSY of compound **7b** recorded in  $\text{CDCl}_3$  at 25 °C.

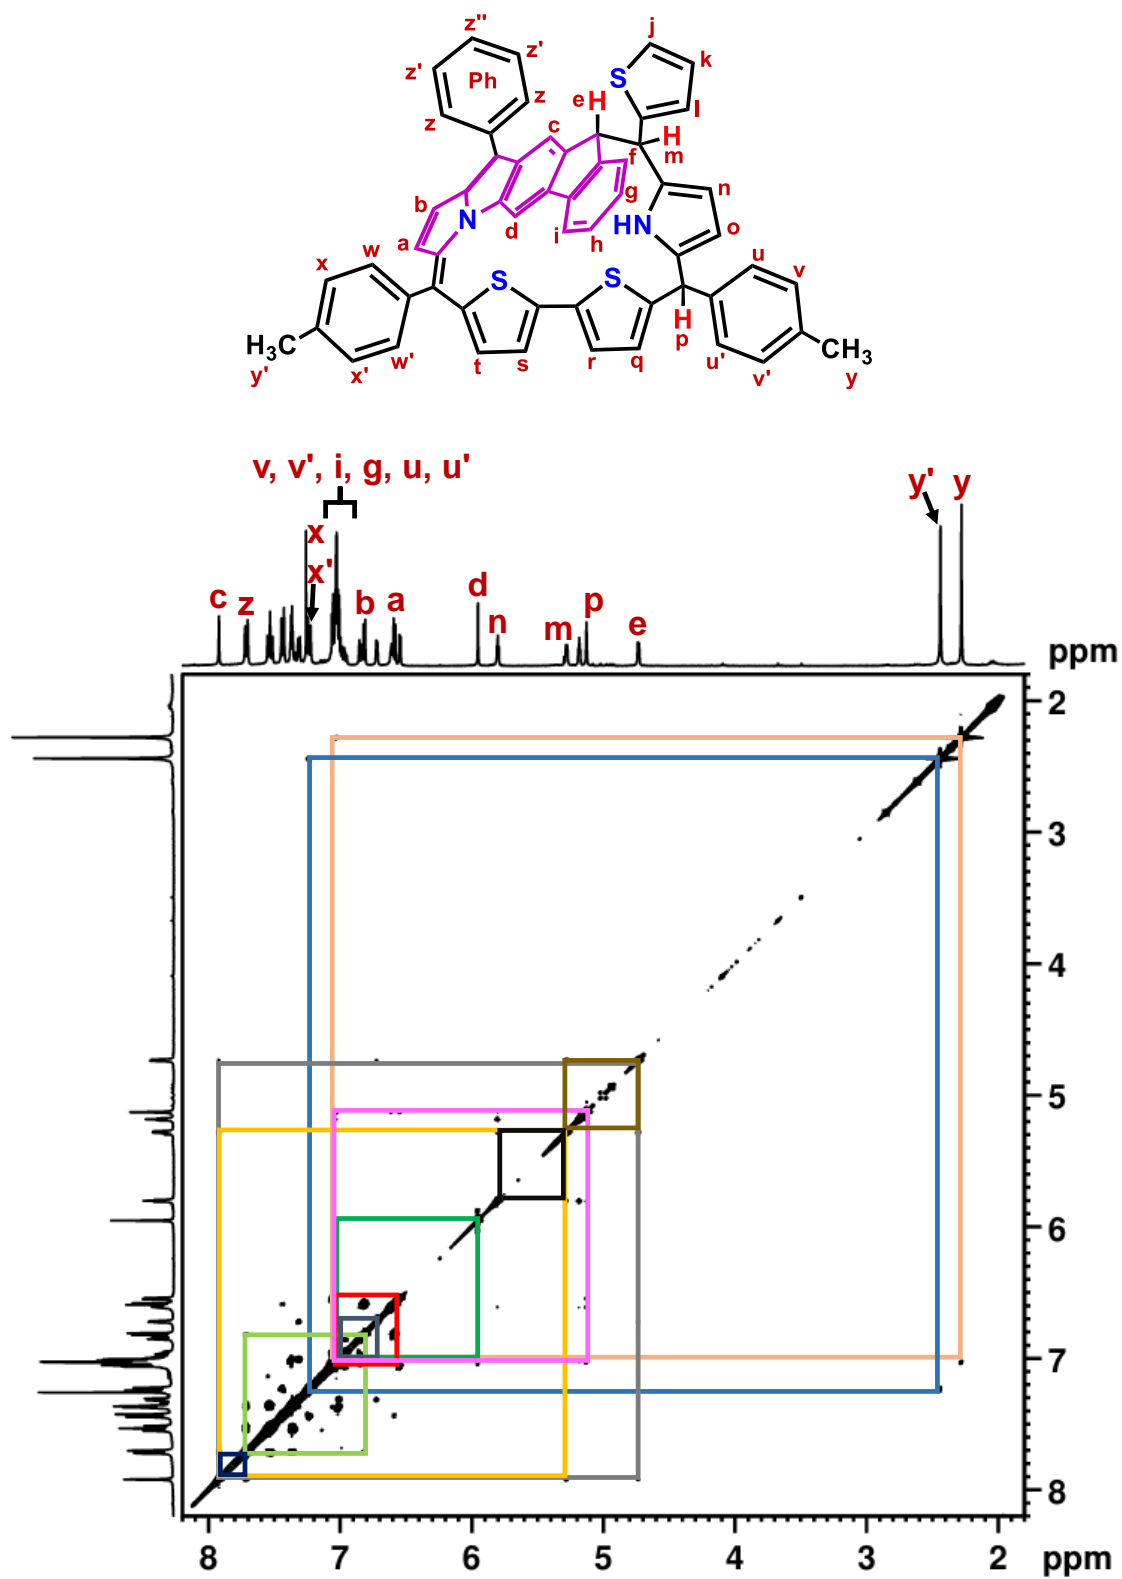

Figure S13. <sup>1</sup>H-<sup>1</sup>H NOESY of compound **7b** recorded in CDCl<sub>3</sub> at 25 °C.

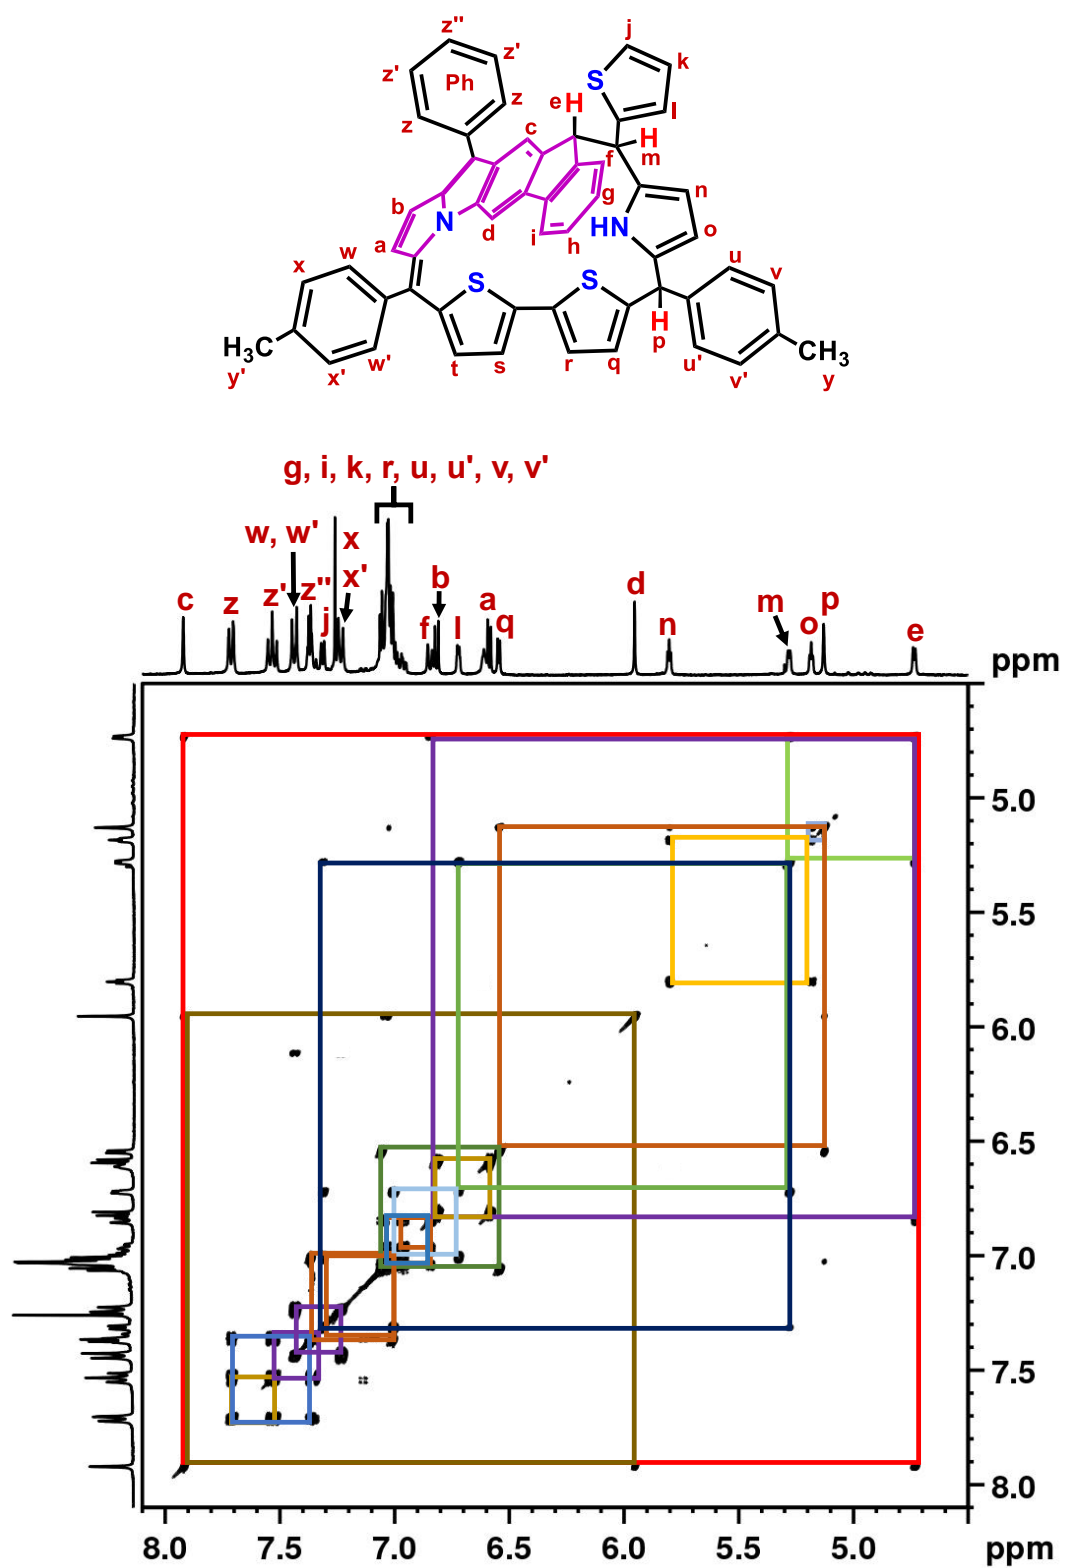

**Figure S14.** Expanded  $^1\text{H}$ - $^1\text{H}$  NOESY of compound **7b** recorded in  $\text{CDCl}_3$  at  $25^\circ\text{C}$ .

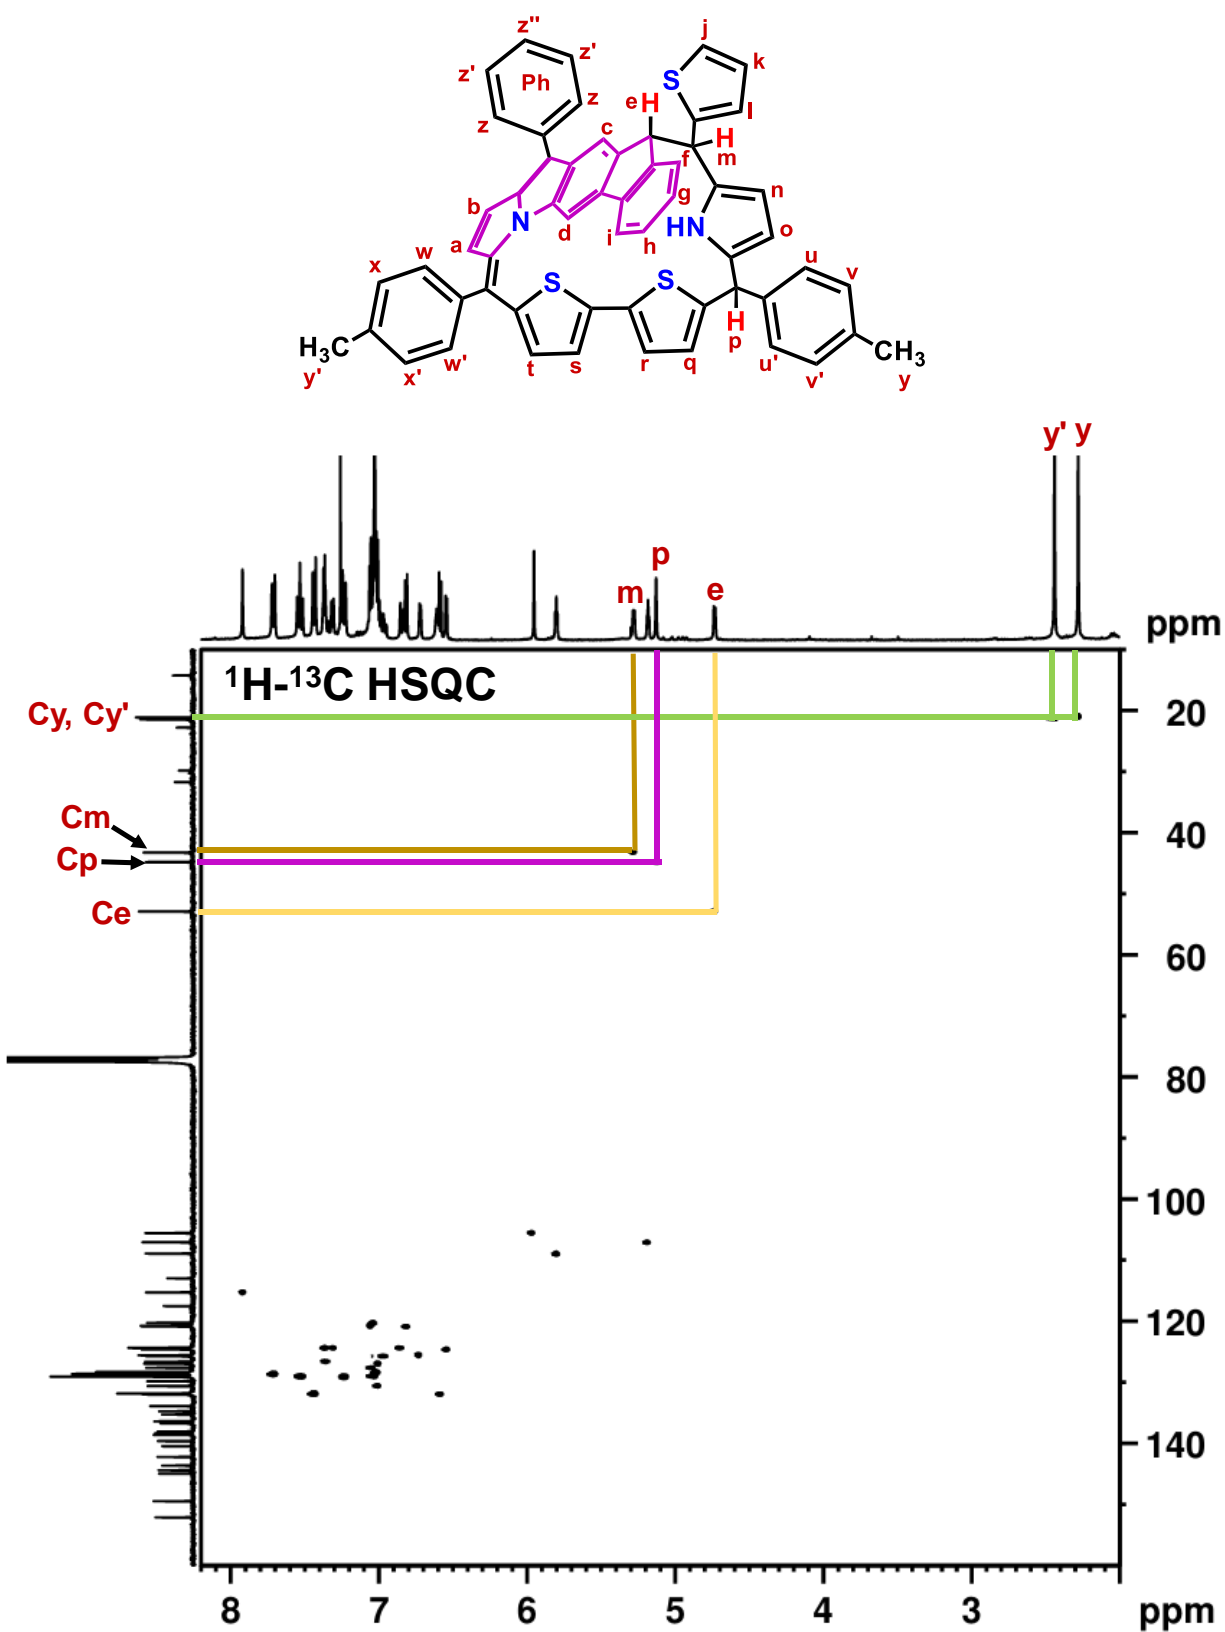

Figure S15.  $^1\text{H}$ - $^{13}\text{C}$  HSQC of compound **7b** recorded in  $\text{CDCl}_3$  at 25 °C.

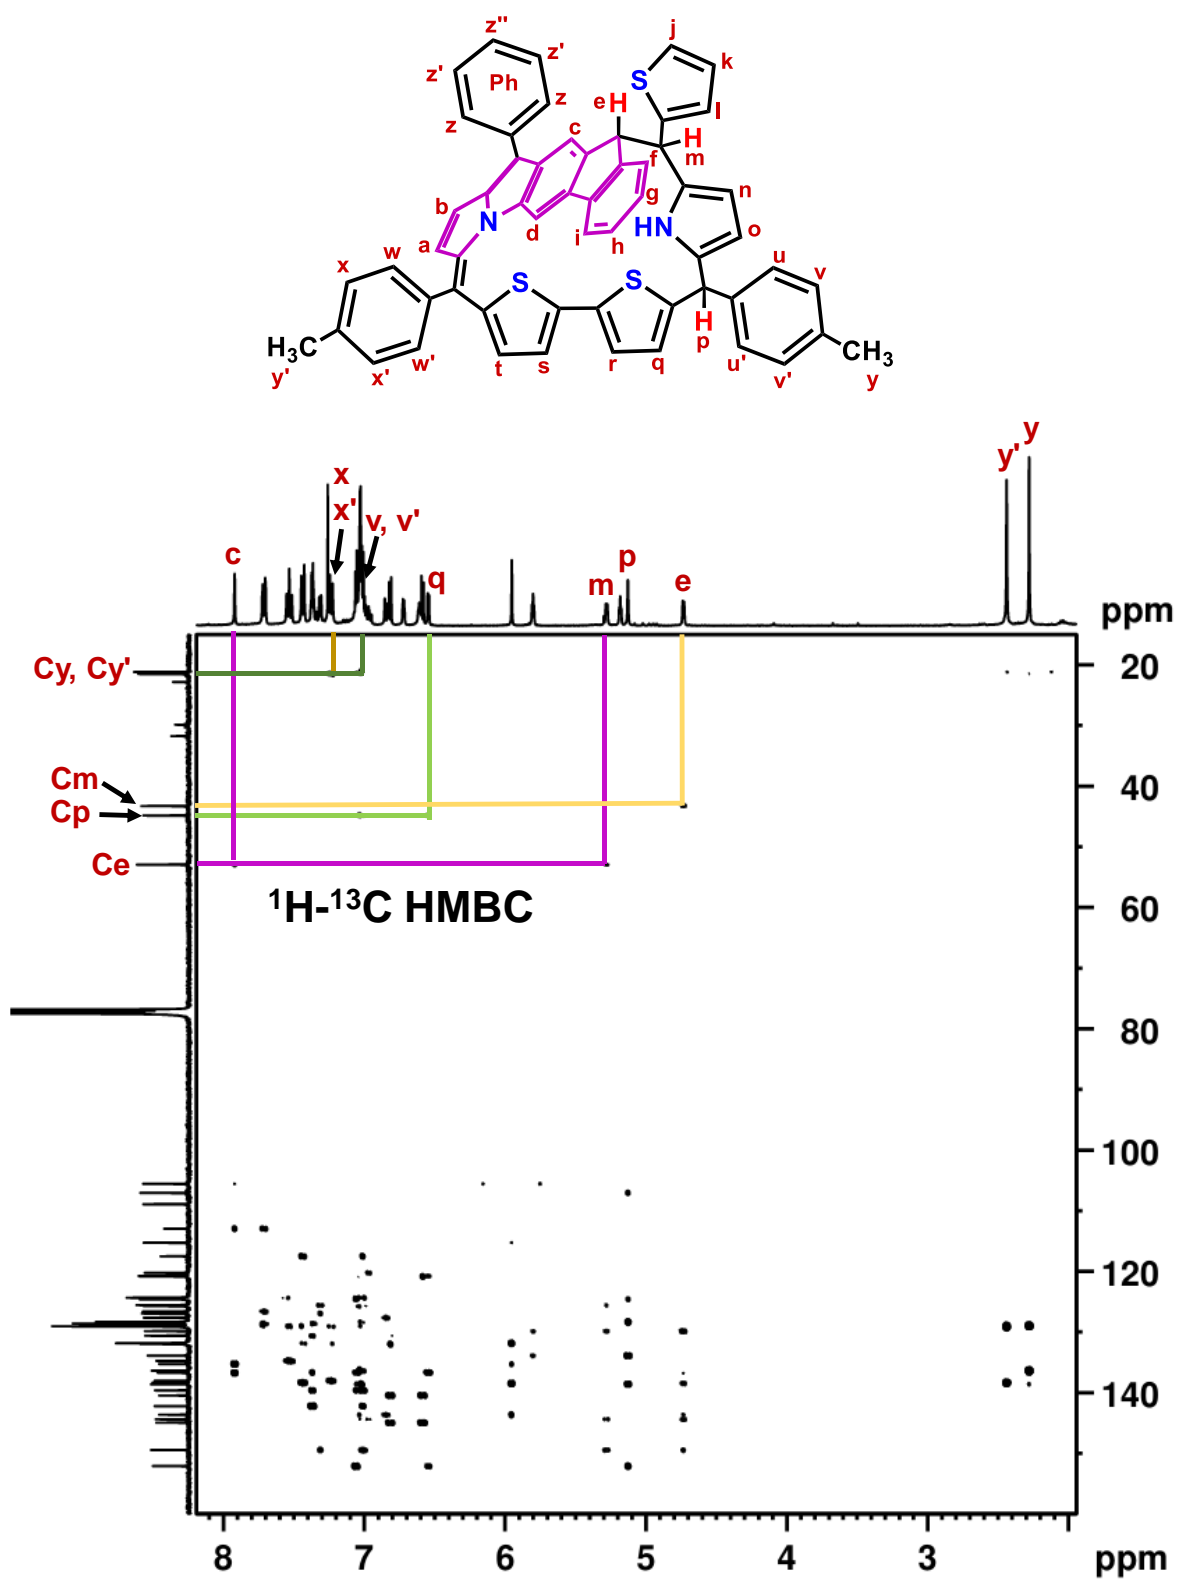

Figure S16.  $^1\text{H}$ - $^{13}\text{C}$  HMBC of compound **7b** recorded in  $\text{CDCl}_3$  at 25  $^\circ\text{C}$ .

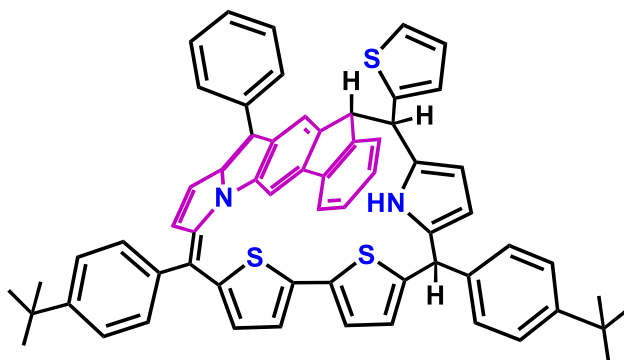

Compound 7c

Department of Chemistry I.I.T. (B)

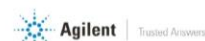

## Sample Information

|                |                 |                    |                                                                |
|----------------|-----------------|--------------------|----------------------------------------------------------------|
| Name           | MR-PV-TBUTYL    | Data File Path     | X:\Projects\MASS Data\Data\MAY-24\MR-PV-TBUTYL.d               |
| Sample ID      |                 | Acq. Time (Local)  | 5/2/2024 4:01:20 PM (UTC+05:30)                                |
| Instrument     | LCMSQTOF-G6545B | Method Path (Acq)  | D:\Projects\MASS Data\Methods\AIB1_POS_100-1500_4000_800_220.m |
| MS Type        | QTOF            | Version (Acq SW)   | 6200 series TOF/6500 series Q-TOF (11.0.203.0)                 |
| Inj. Vol. (ul) | 0.5             | IRM Status         | Success                                                        |
| Position       | P1-F6           | Method Path (DA)   | D:\MassHunter\Report Templates\REPORT METHOD\HRMS_IITB.m       |
| Plate Pos.     |                 | Target Source Path |                                                                |
| Operator       | SYSTEM (SYSTEM) | Result Summary     | 1 qualified (1 targets)                                        |

## Sample Spectra

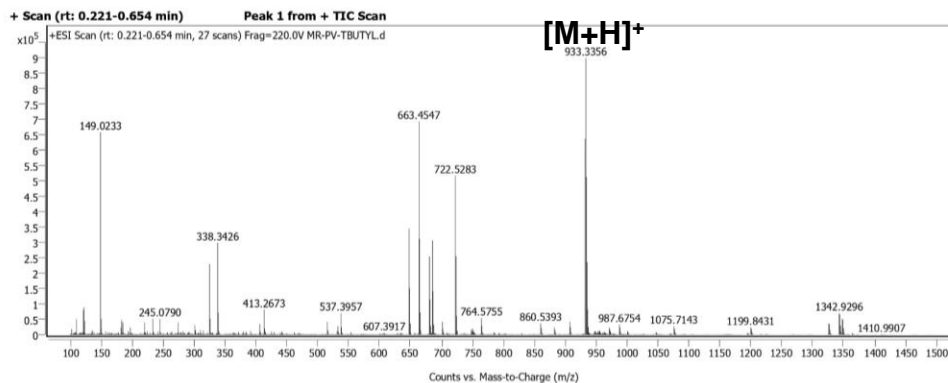

## Compound Details

Cpd. 1: C63 H52 N2 S3

| Formula       | m/z      | Observed M/Z     | Difference Da      | Difference PPM     | Score |
|---------------|----------|------------------|--------------------|--------------------|-------|
| C63 H52 N2 S3 | 933.3355 | 933.335483637879 | -0.251227625312822 | -0.269462340815789 | 90.52 |

## Compound Spectra (Zoomed)

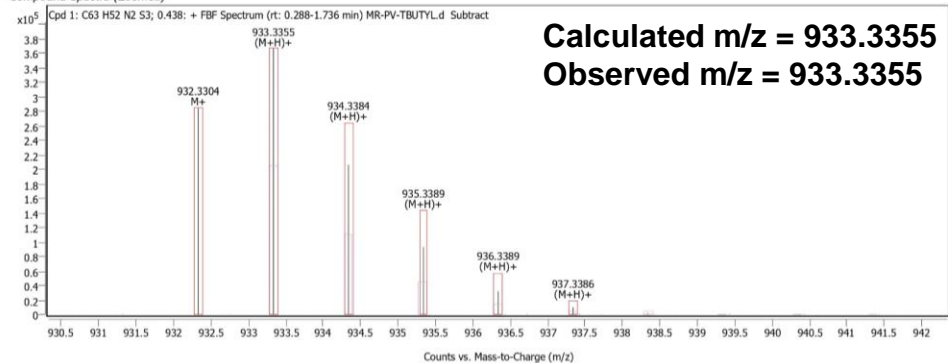

Figure S17(a). HR mass spectrum of the compound 7c.

## Sample Information

|                |                 |                    |                                                                |
|----------------|-----------------|--------------------|----------------------------------------------------------------|
| Name           | MR-PV-TBUTYL    | Data File Path     | X:\Projects\MASS Data\Data\MAY-24\MR-PV-TBUTYL.d               |
| Sample ID      |                 | Acq. Time (Local)  | 5/2/2024 4:01:20 PM (UTC+05:30)                                |
| Instrument     | LCMSQTOF-G65458 | Method Path (Acq)  | D:\Projects\MASS Data\Methods\A1B1_POS_100-1500_4000_800_220.m |
| MS Type        | QTOF            | Version (Acq SW)   | 6200 series TOF/6500 series Q-TOF (11.0.203.0)                 |
| Inj. Vol. (ul) | 0.5             | IRM Status         | Success                                                        |
| Position       | P1-F6           | Method Path (DA)   | D:\MassHunter\Report Templates\REPORT METHOD\HRMS_IITB.m       |
| Plate Pos.     |                 | Target Source Path |                                                                |
| Operator       | SYSTEM (SYSTEM) | Result Summary     | 1 qualified (1 targets)                                        |

## Compound Details

Cpd. 1: C<sub>63</sub>H<sub>52</sub>N<sub>2</sub>S<sub>3</sub>

| Formula                                                       | m/z      | Observed M/Z     | Difference Da      | Difference PPM     | Score |
|---------------------------------------------------------------|----------|------------------|--------------------|--------------------|-------|
| C <sub>63</sub> H <sub>52</sub> N <sub>2</sub> S <sub>3</sub> | 933.3355 | 933.335483637879 | -0.251227625312822 | -0.269462340815789 | 90.52 |

## Compound Spectra (Zoomed)

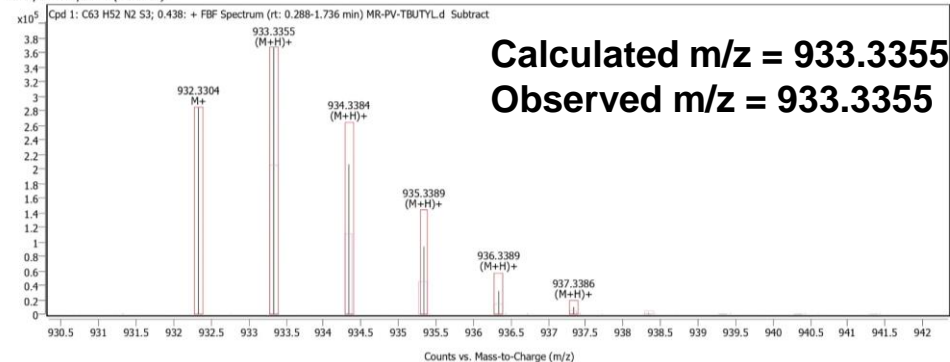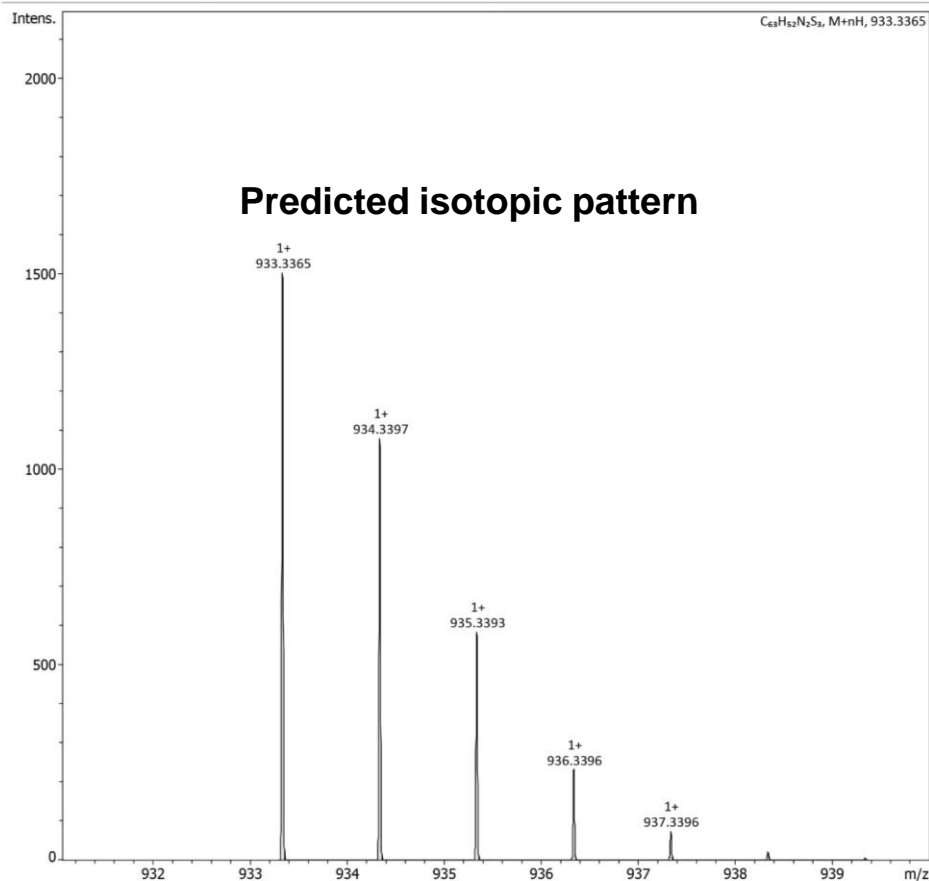Figure S17(b). HR mass spectrum of the compound **7c**.

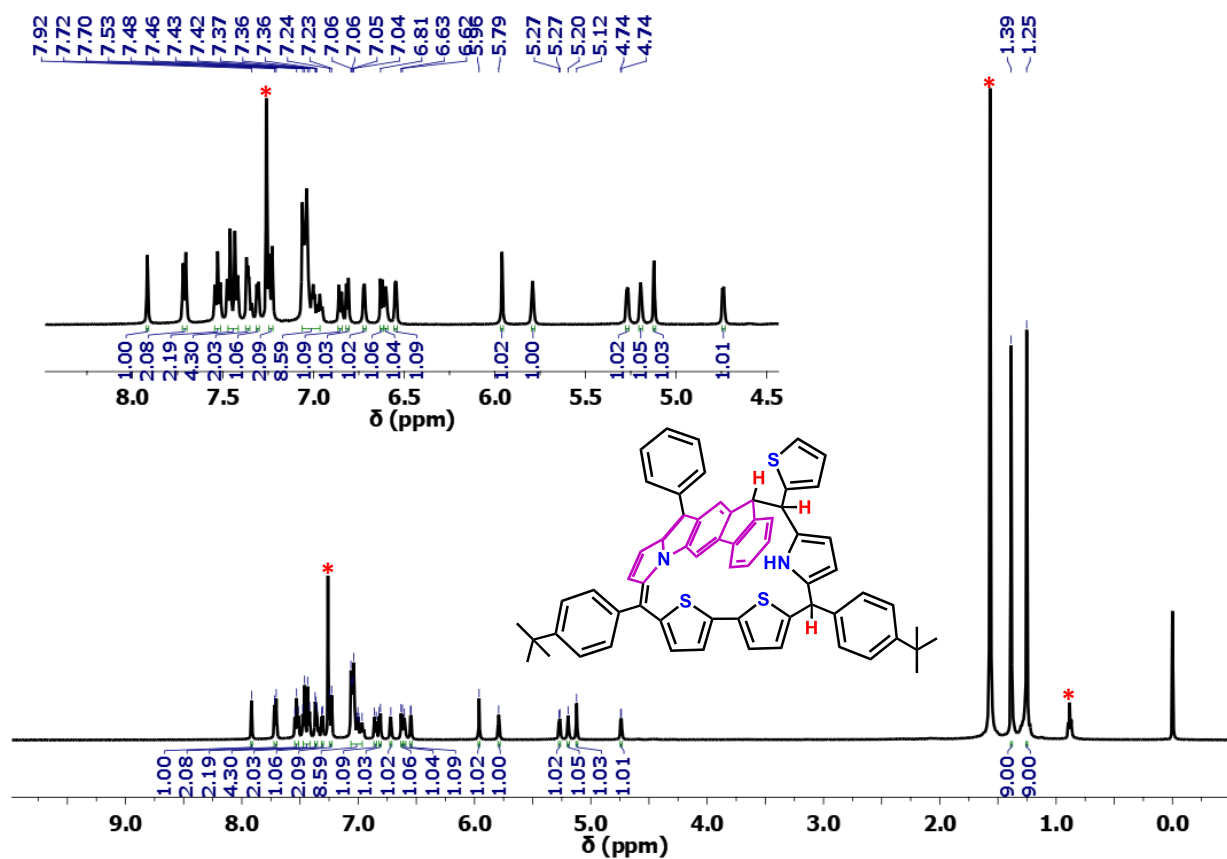

**Figure S18.**  $^1\text{H}$ -NMR spectrum of the compound **7c** recorded in  $\text{CDCl}_3$  on 500 MHz NMR instrument. Note: Peaks marked with asterisk (\*) are due to residual solvents.

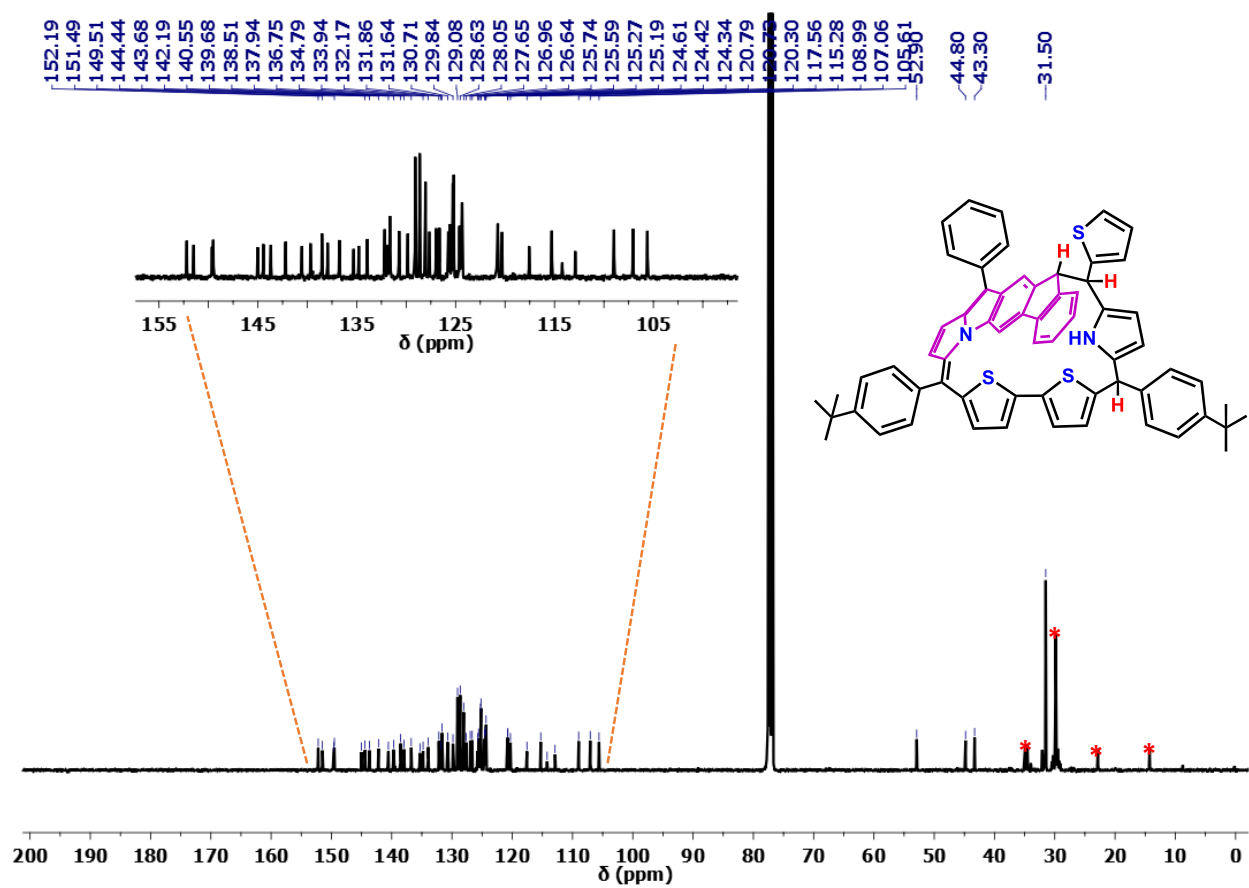

**Figure S19.**  $^{13}\text{C}$  NMR spectrum of the compound **7c** recorded in  $\text{CDCl}_3$  on 101 MHz NMR instrument. Note: Peaks marked with asterisk (\*) are due to residual solvents.

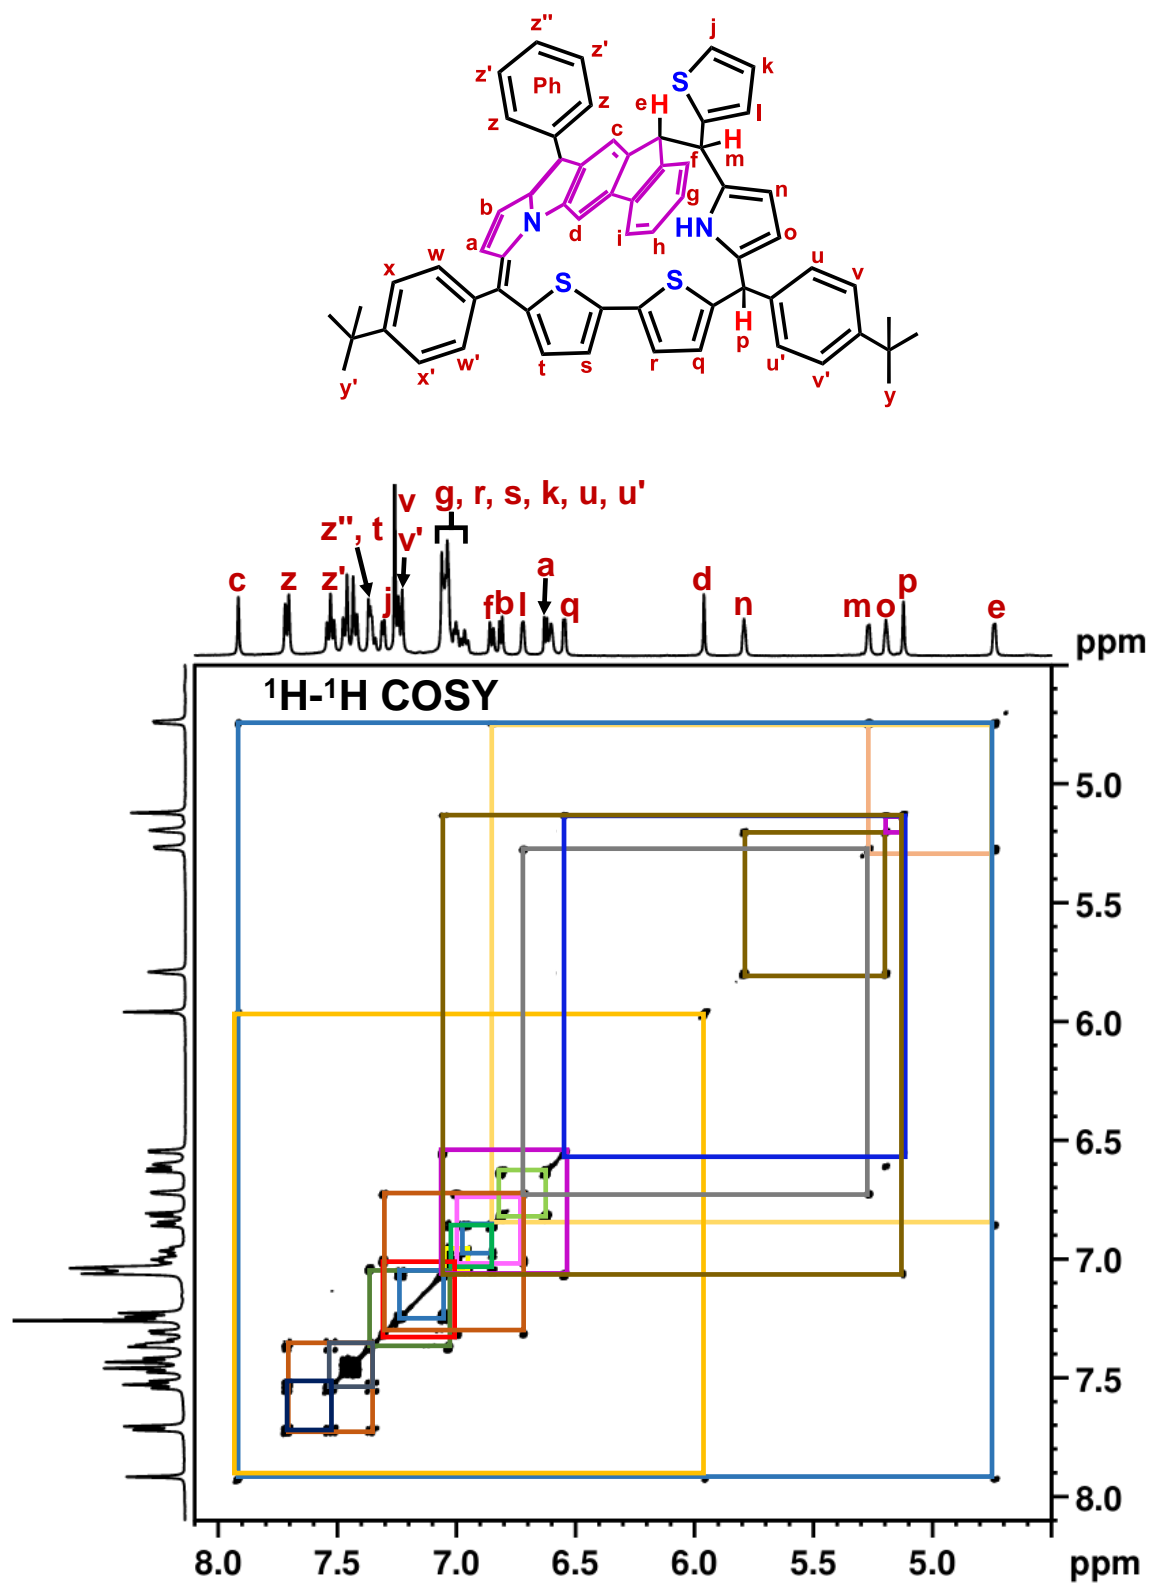

**Figure S20.** Partial  $^1\text{H}$ - $^1\text{H}$  COSY of compound **7c** recorded in  $\text{CDCl}_3$  at 25  $^\circ\text{C}$ .

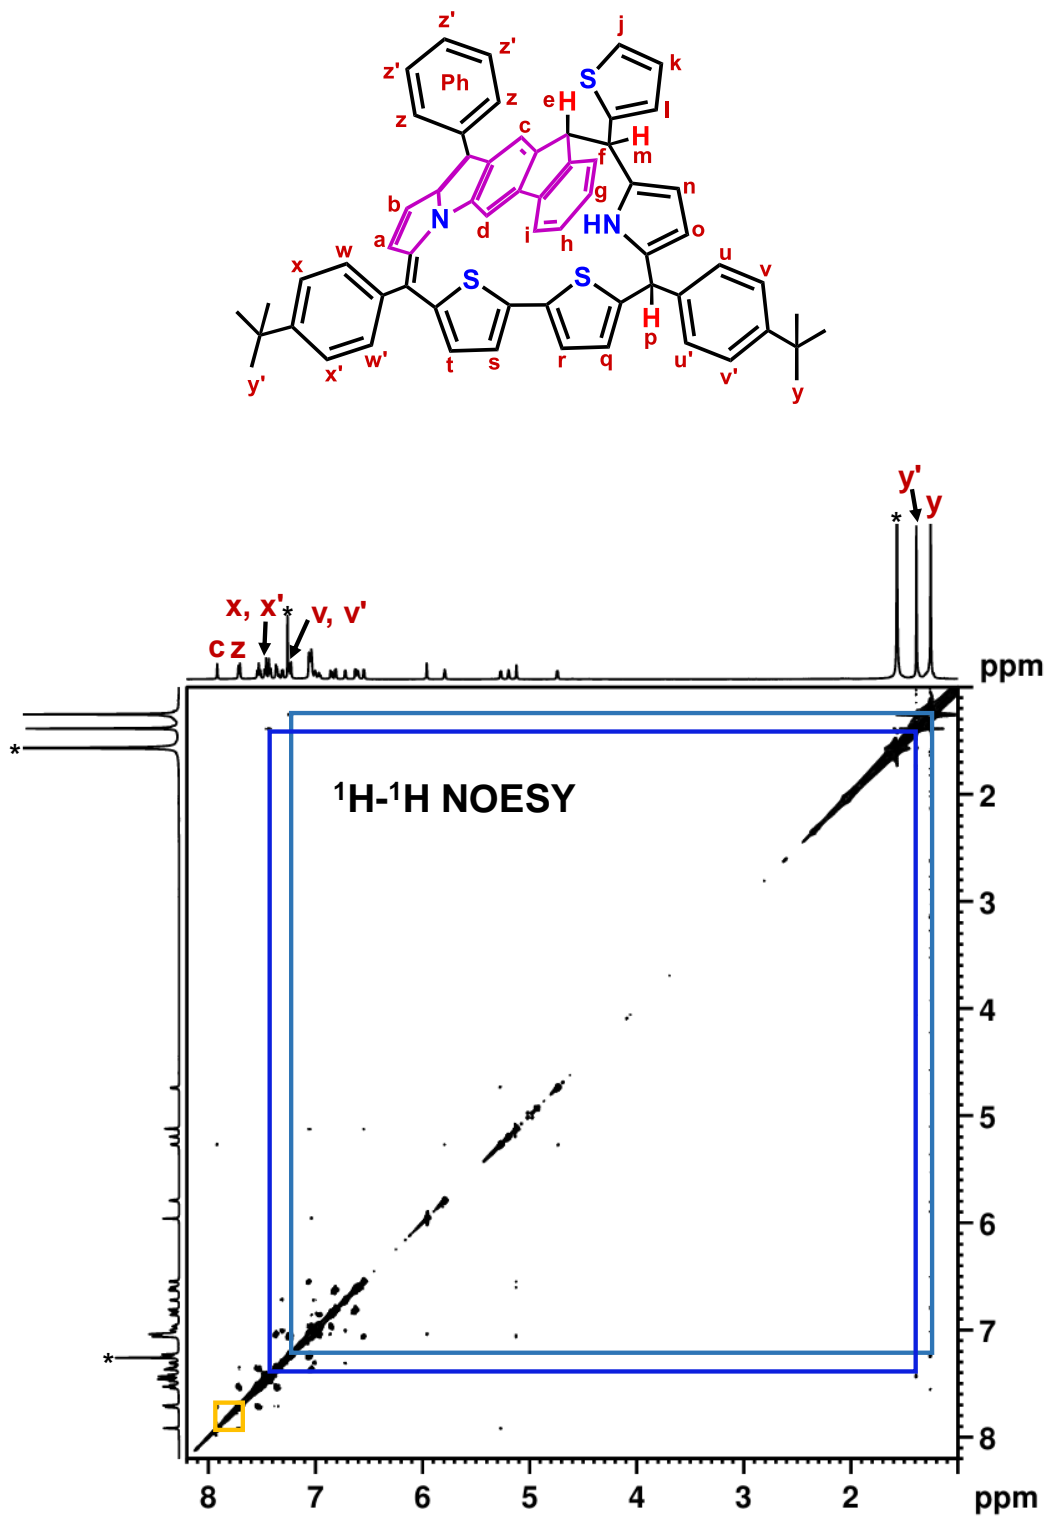

**Figure S21.**  $^1\text{H}$ - $^1\text{H}$  NOESY of compound **7c** recorded in  $\text{CDCl}_3$  at 25 °C. Note: Peaks marked with asterisk (\*) are due to residual solvents.

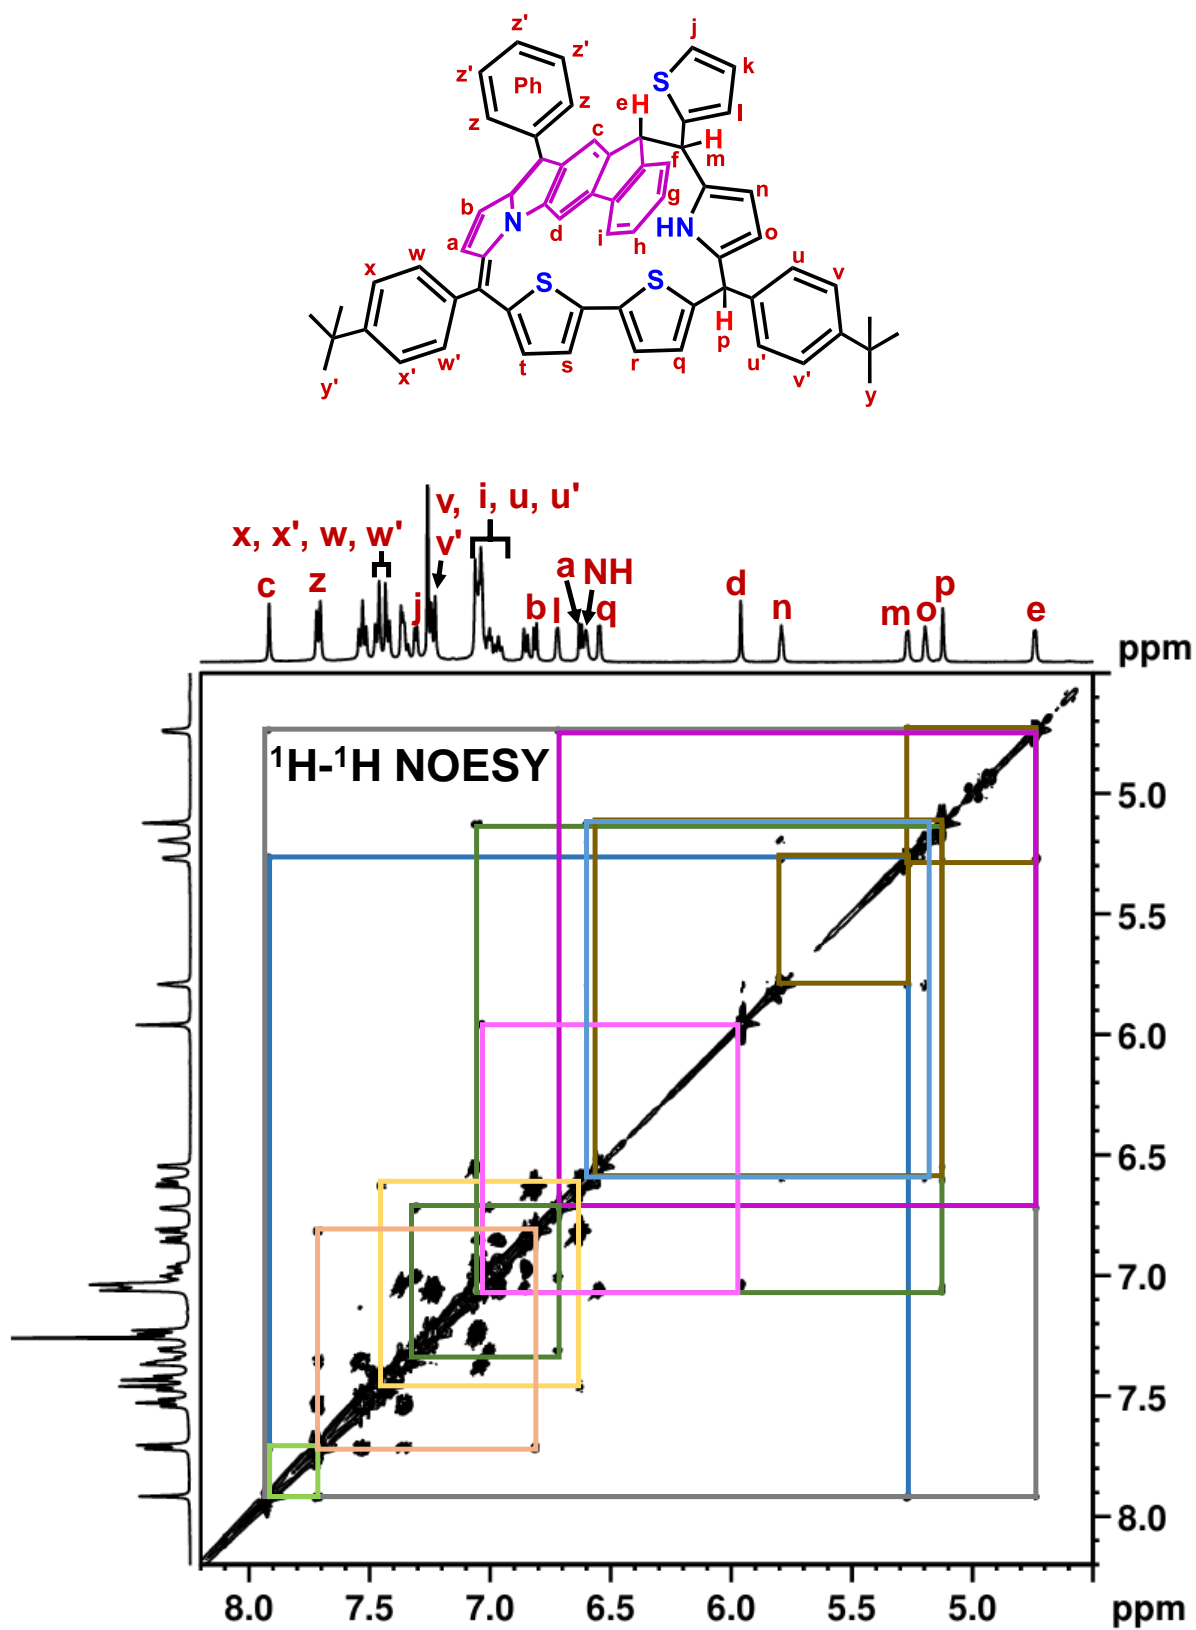

**Figure S22.** Expanded  $^1\text{H}$ - $^1\text{H}$  NOESY of compound **7c** recorded in  $\text{CDCl}_3$  at 25  $^\circ\text{C}$ .

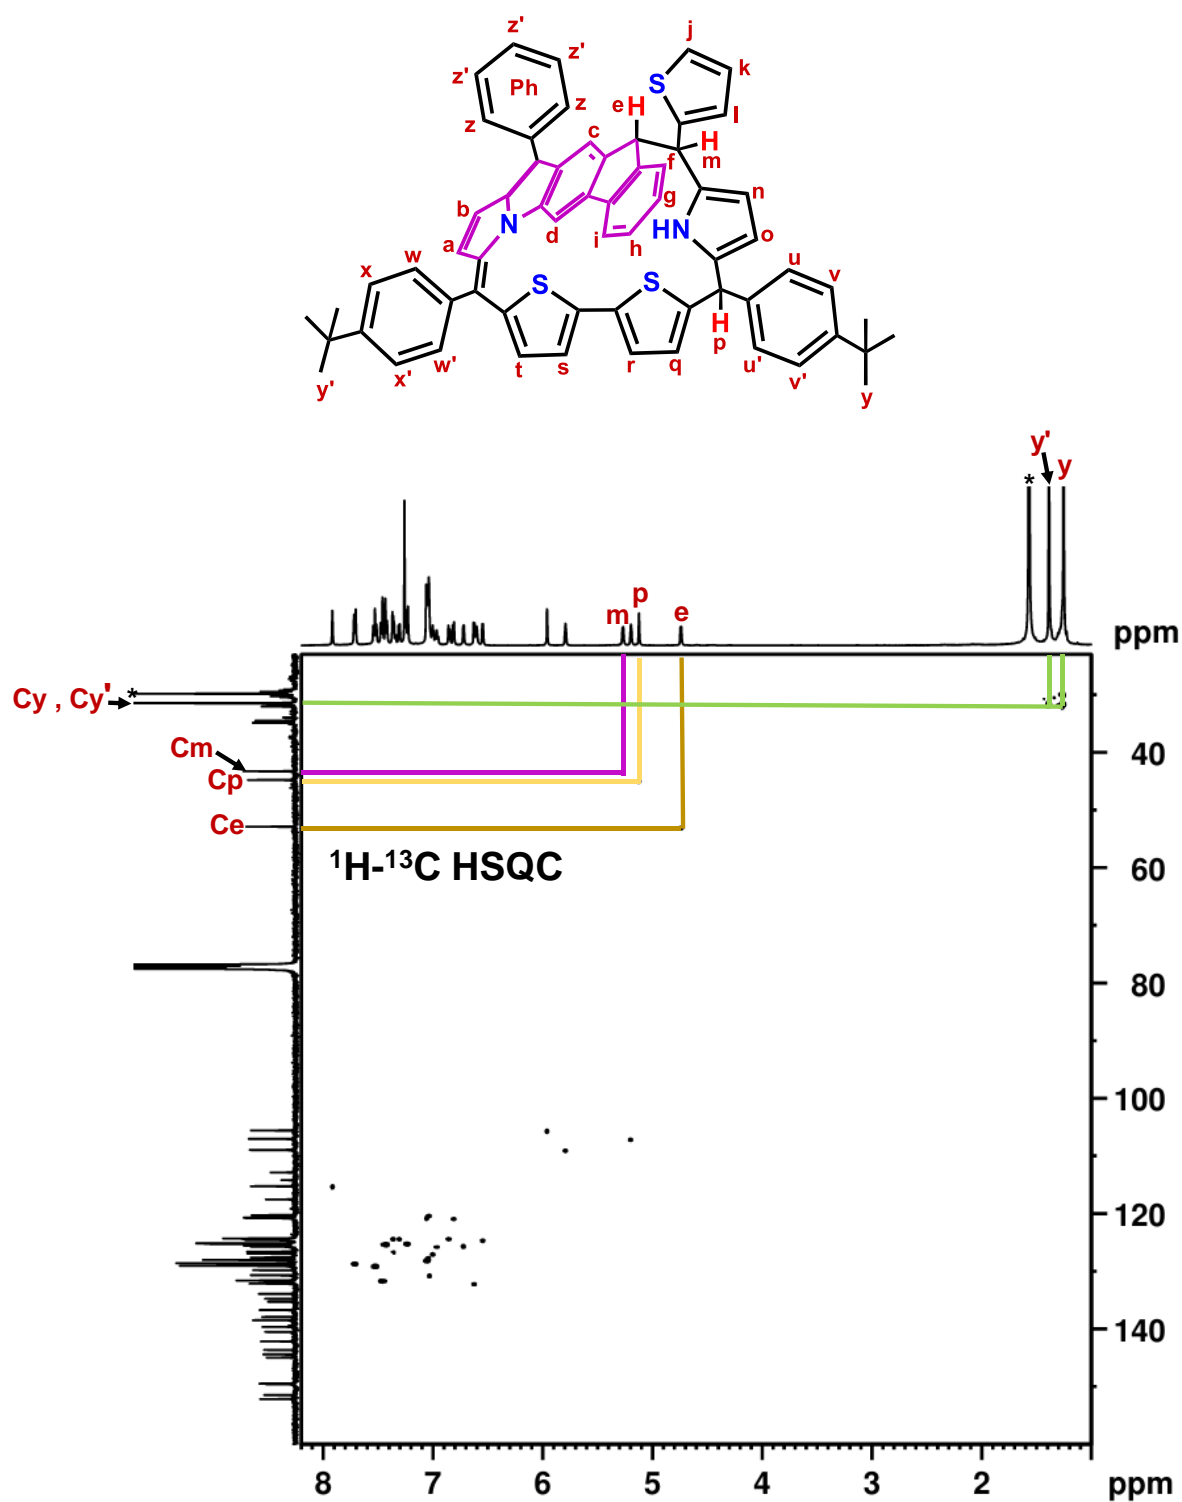

**Figure S23.**  $^1\text{H}$ - $^{13}\text{C}$  HSQC of compound **7c** recorded in  $\text{CDCl}_3$  at 25 °C. Note: Peaks marked with asterisk (\*) are due to residual solvents.

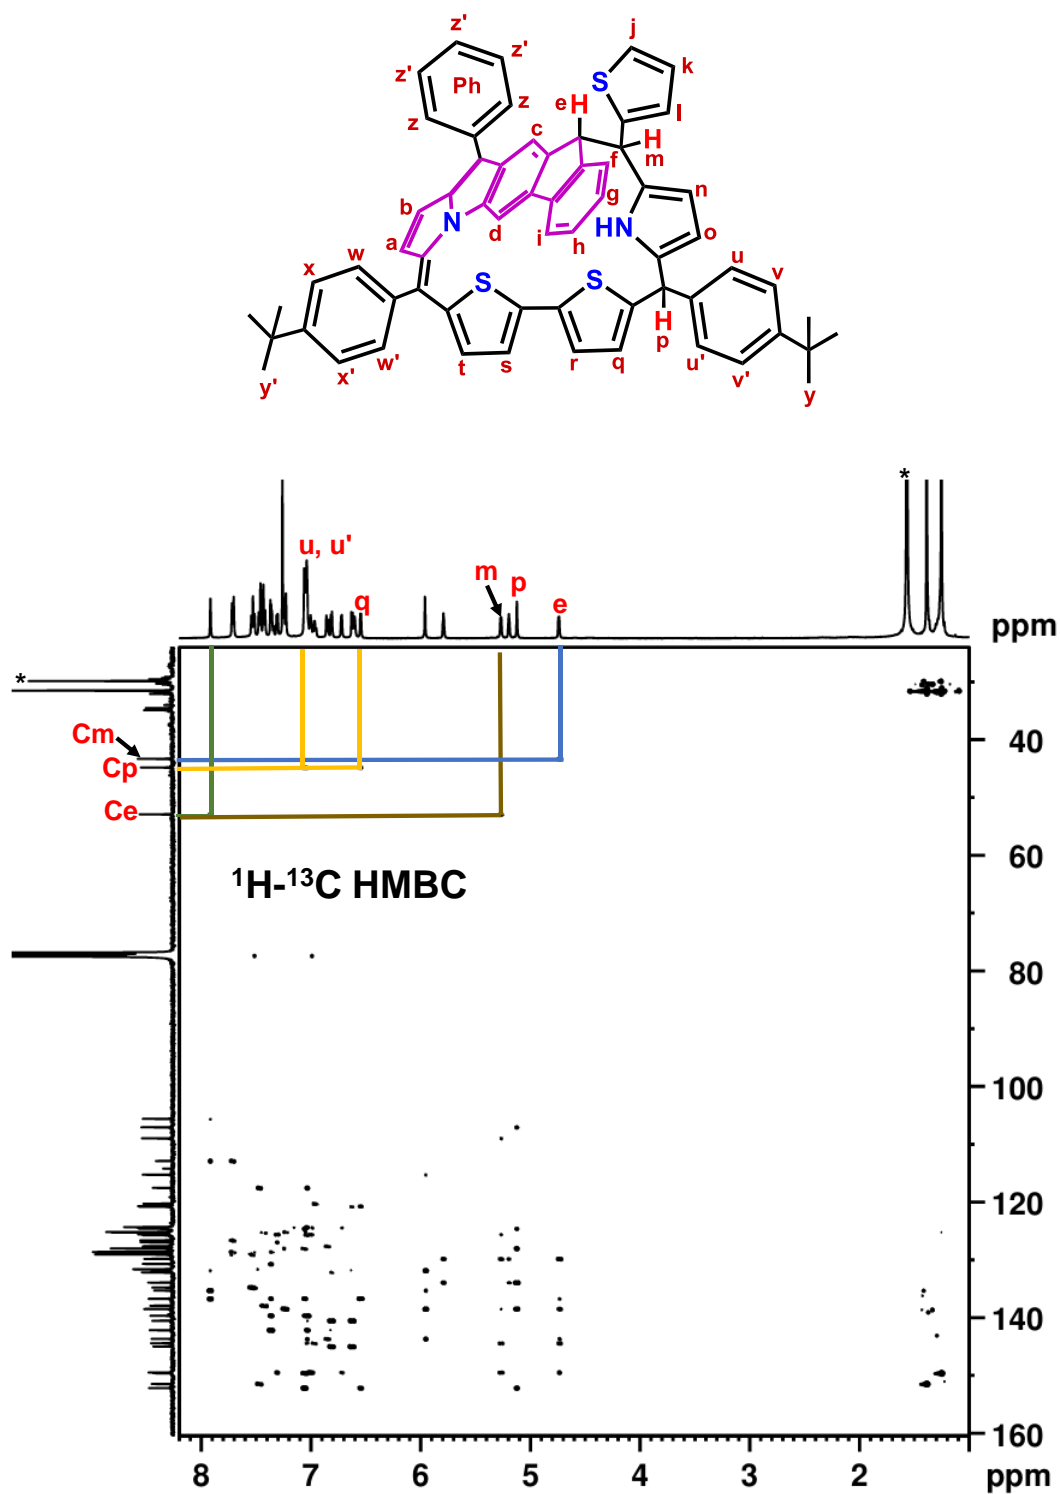

**Figure S24.**  $^1\text{H}$ - $^{13}\text{C}$  HMBC of compound **7c** recorded in  $\text{CDCl}_3$  at 25 °C. Note: Peaks marked with asterisk (\*) are due to residual solvents.

**Table S1.** Crystal data and structure refinement for Compound **7a**.

|                                      |                                                                              |
|--------------------------------------|------------------------------------------------------------------------------|
| Compound                             | <b>7a</b>                                                                    |
| Empirical Formula                    | C <sub>57</sub> H <sub>40</sub> N <sub>2</sub> O <sub>2</sub> S <sub>3</sub> |
| Crystal System                       | Triclinic                                                                    |
| Space Group                          | P-1                                                                          |
| $R_1$ ( $I > 2.00 \sigma(I)$ )       | 0.0816                                                                       |
| $wR_2$ (All reflections)             | 0.2464                                                                       |
| Goodness-of-fit on $F^2$             | 1.032                                                                        |
| $a$ [Å]                              | 11.9857(9)                                                                   |
| $b$ [Å]                              | 13.2787(8)                                                                   |
| $c$ [Å]                              | 13.8288(10)                                                                  |
| $\alpha$ [°]                         | 100.139(5)                                                                   |
| $\beta$ [°]                          | 90.991(6)                                                                    |
| $\gamma$ [°]                         | 94.836(5)                                                                    |
| $V$ [Å <sup>3</sup> ]                | 2157.7(3)                                                                    |
| $Z$                                  | 2                                                                            |
| $T$ [K]                              | 150.15                                                                       |
| $\delta_{calc}$ [g/cm <sup>3</sup> ] | 1.356                                                                        |
| $F_{000}$                            | 920.0                                                                        |
| $2 \theta_{max}$ [°]                 | 50                                                                           |
| Reflections collected                | 61621                                                                        |
| Independent reflections              | 7602                                                                         |
| no. params.                          | 579                                                                          |
| <b>CCDC no.</b>                      | <b>2365345</b>                                                               |

**Table S2.** Bond Lengths for compound **7a**.

| Atom | Atom | Length/Å | Atom | Atom | Length/Å | Atom | Atom | Length/Å |
|------|------|----------|------|------|----------|------|------|----------|
| S1   | C23  | 1.723(5) | C5   | C17  | 1.435(6) | C14  | C9   | 1.396(7) |
| S1   | C20  | 1.734(5) | C5   | C4   | 1.447(6) | C14  | C13  | 1.395(7) |
| S2   | C24  | 1.732(5) | C4   | C38  | 1.472(6) | C9   | C10  | 1.393(7) |
| S2   | C27  | 1.726(5) | C7   | C15  | 1.402(7) | C35  | C34  | 1.407(7) |
| S3   | C34  | 1.720(5) | C7   | C8   | 1.517(6) | C35  | C36  | 1.439(8) |
| S3   | C37  | 1.697(6) | C44  | C45  | 1.411(6) | C22  | C21  | 1.411(7) |
| O1   | C47  | 1.361(5) | C44  | C19  | 1.480(6) | C28  | C29  | 1.504(7) |
| O1   | C48  | 1.425(6) | C44  | C50  | 1.385(7) | C28  | C27  | 1.535(6) |
| N1   | C3   | 1.395(6) | C45  | C46  | 1.383(7) | C29  | C30  | 1.366(7) |
| N1   | C18  | 1.429(6) | C38  | C43  | 1.399(7) | C13  | C12  | 1.389(7) |
| N1   | C17  | 1.393(6) | C38  | C39  | 1.374(7) | C27  | C26  | 1.333(7) |
| N2   | C32  | 1.385(6) | C19  | C20  | 1.465(6) | C31  | C30  | 1.429(7) |
| N2   | C29  | 1.367(6) | C33  | C32  | 1.504(6) | C10  | C11  | 1.397(7) |
| O2   | C54  | 1.390(6) | C33  | C8   | 1.568(6) | C41  | C42  | 1.385(8) |
| O2   | C55  | 1.458(9) | C33  | C34  | 1.516(6) | C41  | C40  | 1.370(8) |
| C6   | C5   | 1.411(6) | C51  | C28  | 1.521(6) | C12  | C11  | 1.381(8) |
| C6   | C7   | 1.380(6) | C51  | C57  | 1.414(7) | C25  | C26  | 1.409(7) |
| C3   | C2   | 1.442(6) | C51  | C52  | 1.358(7) | C57  | C56  | 1.377(7) |
| C3   | C4   | 1.378(7) | C23  | C24  | 1.453(6) | C43  | C42  | 1.368(8) |
| C1   | C2   | 1.352(6) | C23  | C22  | 1.380(7) | C56  | C54  | 1.391(8) |

|     |     |          |     |     |          |     |     |          |
|-----|-----|----------|-----|-----|----------|-----|-----|----------|
| C1  | C18 | 1.456(6) | C50 | C49 | 1.392(6) | C54 | C53 | 1.369(8) |
| C18 | C19 | 1.366(6) | C20 | C21 | 1.376(7) | C52 | C53 | 1.396(7) |
| C16 | C17 | 1.382(6) | C15 | C14 | 1.453(6) | C39 | C40 | 1.389(8) |
| C16 | C15 | 1.398(6) | C32 | C31 | 1.339(7) | C36 | C37 | 1.330(9) |
| C47 | C49 | 1.389(6) | C8  | C9  | 1.513(7) |     |     |          |
| C47 | C46 | 1.388(7) | C24 | C25 | 1.352(7) |     |     |          |

**Table S3.** Bond Angles for compound **7a**.

| Atom | Atom | Atom | Angle/°  | Atom | Atom | Atom | Angle/°  |
|------|------|------|----------|------|------|------|----------|
| C23  | S1   | C20  | 92.7(2)  | C21  | C20  | C19  | 128.3(4) |
| C27  | S2   | C24  | 91.9(2)  | C16  | C15  | C7   | 121.8(4) |
| C37  | S3   | C34  | 92.1(3)  | C16  | C15  | C14  | 129.1(4) |
| C47  | O1   | C48  | 117.5(4) | C7   | C15  | C14  | 108.9(4) |
| C3   | N1   | C18  | 109.7(4) | N2   | C32  | C33  | 121.4(4) |
| C17  | N1   | C3   | 109.2(4) | C31  | C32  | N2   | 106.9(4) |
| C17  | N1   | C18  | 140.9(4) | C31  | C32  | C33  | 131.5(5) |
| C29  | N2   | C32  | 110.9(4) | C7   | C8   | C33  | 115.8(4) |
| C54  | O2   | C55  | 117.1(5) | C9   | C8   | C7   | 102.5(4) |
| C7   | C6   | C5   | 118.3(4) | C9   | C8   | C33  | 114.8(4) |
| N1   | C3   | C2   | 107.2(4) | C23  | C24  | S2   | 119.4(3) |
| C4   | C3   | N1   | 110.5(4) | C25  | C24  | S2   | 109.7(4) |
| C4   | C3   | C2   | 142.3(4) | C25  | C24  | C23  | 129.9(4) |
| C2   | C1   | C18  | 110.2(4) | C9   | C14  | C15  | 109.0(4) |

|     |     |     |          |     |     |     |          |
|-----|-----|-----|----------|-----|-----|-----|----------|
| C1  | C2  | C3  | 108.3(4) | C13 | C14 | C15 | 130.4(5) |
| N1  | C18 | C1  | 104.5(4) | C13 | C14 | C9  | 120.6(4) |
| C19 | C18 | N1  | 129.7(4) | C14 | C9  | C8  | 109.9(4) |
| C19 | C18 | C1  | 125.1(4) | C10 | C9  | C8  | 129.7(5) |
| C17 | C16 | C15 | 116.8(4) | C10 | C9  | C14 | 120.3(5) |
| O1  | C47 | C49 | 124.2(5) | C45 | C46 | C47 | 120.3(4) |
| O1  | C47 | C46 | 116.2(4) | C34 | C35 | C36 | 108.1(5) |
| C46 | C47 | C49 | 119.6(4) | C33 | C34 | S3  | 120.6(4) |
| C6  | C5  | C17 | 119.0(4) | C35 | C34 | S3  | 112.1(4) |
| C6  | C5  | C4  | 132.4(4) | C35 | C34 | C33 | 127.2(4) |
| C17 | C5  | C4  | 108.4(4) | C23 | C22 | C21 | 112.8(4) |
| N1  | C17 | C5  | 106.1(4) | C51 | C28 | C27 | 112.8(4) |
| C16 | C17 | N1  | 131.4(4) | C29 | C28 | C51 | 113.1(4) |
| C16 | C17 | C5  | 122.5(4) | C29 | C28 | C27 | 110.8(4) |
| C3  | C4  | C5  | 105.7(4) | N2  | C29 | C28 | 118.9(4) |
| C3  | C4  | C38 | 125.8(4) | C30 | C29 | N2  | 106.0(4) |
| C5  | C4  | C38 | 128.5(4) | C30 | C29 | C28 | 135.0(4) |
| C6  | C7  | C15 | 121.6(4) | C12 | C13 | C14 | 118.8(5) |
| C6  | C7  | C8  | 128.5(4) | C28 | C27 | S2  | 121.2(4) |
| C15 | C7  | C8  | 109.5(4) | C26 | C27 | S2  | 111.2(4) |
| C45 | C44 | C19 | 122.4(4) | C26 | C27 | C28 | 127.3(4) |
| C50 | C44 | C45 | 116.8(4) | C20 | C21 | C22 | 113.8(4) |
| C50 | C44 | C19 | 120.7(4) | C32 | C31 | C30 | 107.9(5) |

|     |     |     |          |     |     |     |          |
|-----|-----|-----|----------|-----|-----|-----|----------|
| C46 | C45 | C44 | 121.3(5) | C9  | C10 | C11 | 118.5(5) |
| C43 | C38 | C4  | 120.7(4) | C40 | C41 | C42 | 118.5(5) |
| C39 | C38 | C4  | 122.2(4) | C11 | C12 | C13 | 120.7(5) |
| C39 | C38 | C43 | 117.0(5) | C24 | C25 | C26 | 114.0(5) |
| C18 | C19 | C44 | 120.1(4) | C29 | C30 | C31 | 108.1(4) |
| C18 | C19 | C20 | 123.8(4) | C27 | C26 | C25 | 113.2(5) |
| C20 | C19 | C44 | 115.9(4) | C56 | C57 | C51 | 121.4(5) |
| C32 | C33 | C8  | 114.6(4) | C12 | C11 | C10 | 121.0(5) |
| C32 | C33 | C34 | 112.2(4) | C42 | C43 | C38 | 121.6(5) |
| C34 | C33 | C8  | 109.7(4) | C57 | C56 | C54 | 118.5(5) |
| C57 | C51 | C28 | 118.7(5) | O2  | C54 | C56 | 115.1(5) |
| C52 | C51 | C28 | 123.1(4) | C53 | C54 | O2  | 123.7(6) |
| C52 | C51 | C57 | 118.0(5) | C53 | C54 | C56 | 121.2(5) |
| C24 | C23 | S1  | 121.5(3) | C51 | C52 | C53 | 121.8(5) |
| C22 | C23 | S1  | 110.6(3) | C54 | C53 | C52 | 119.1(5) |
| C22 | C23 | C24 | 127.0(4) | C38 | C39 | C40 | 121.5(5) |
| C44 | C50 | C49 | 122.5(4) | C43 | C42 | C41 | 120.6(5) |
| C47 | C49 | C50 | 119.3(5) | C37 | C36 | C35 | 115.9(6) |
| C19 | C20 | S1  | 121.9(3) | C36 | C37 | S3  | 111.7(5) |
| C21 | C20 | S1  | 109.8(3) | C41 | C40 | C39 | 120.7(6) |

## Electronic absorption spectral analysis:

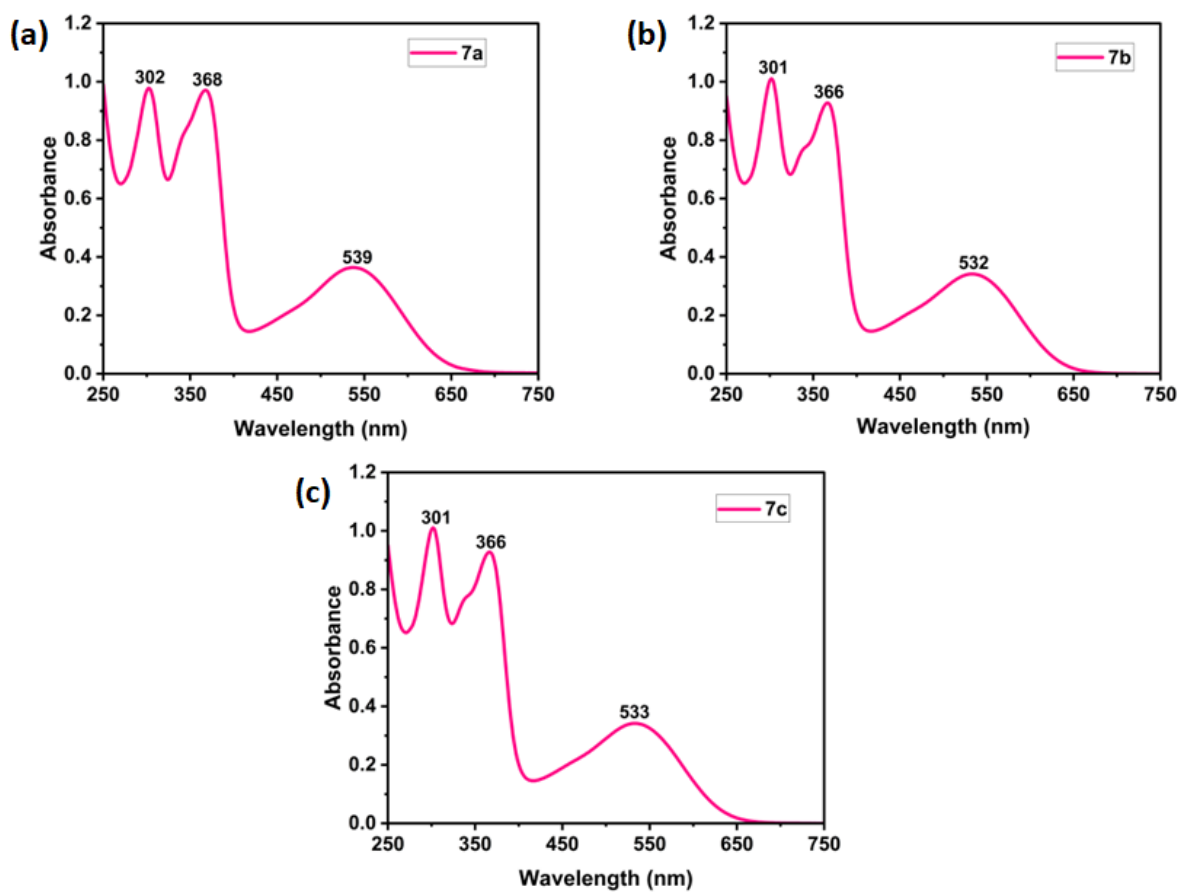

**Figure S25.** Absorption spectra of the compounds **7a-c** ( $4 \times 10^{-5}$  M) free base (pink line) recorded in  $\text{CHCl}_3$  at room temperature.

## Electrochemical properties:

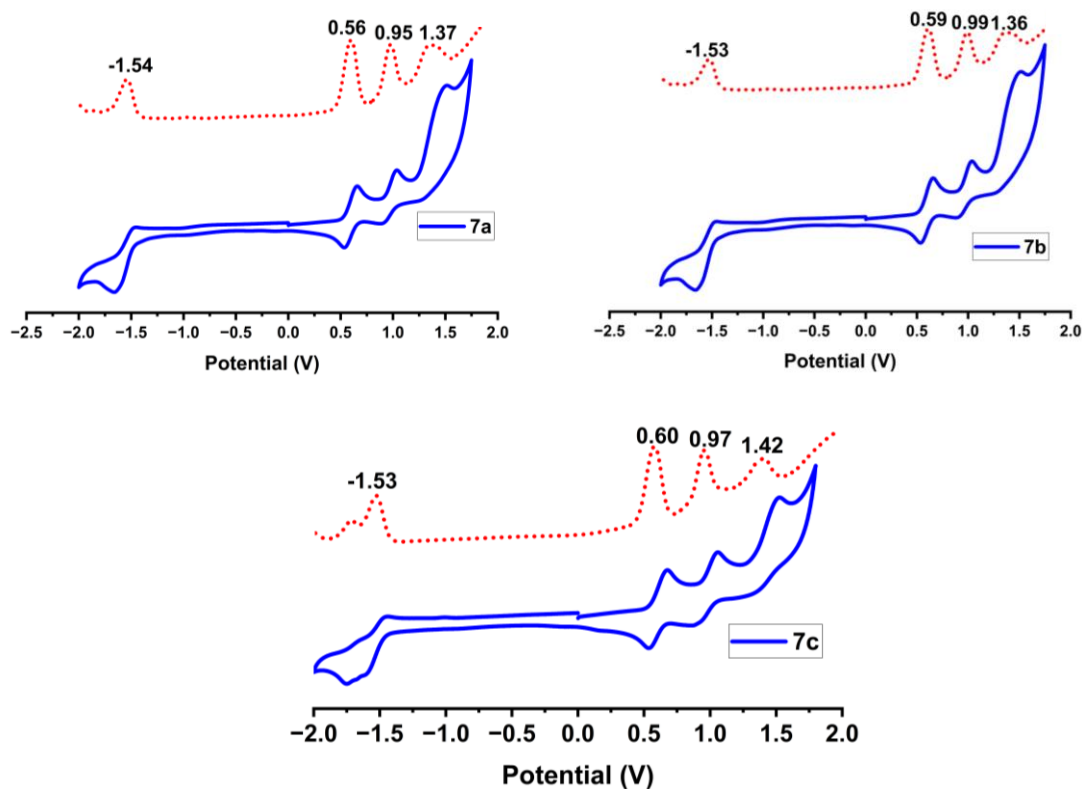

**Figure S26.** Comparison of cyclic voltammograms (blue solid lines) along with differential pulse voltammograms (red dotted lines) of the compounds **7a-c** recorded in  $\text{CH}_2\text{Cl}_2$ .

**Table S4.** Selected TD-DFT calculated oscillator strengths and compositions of the major electronic transitions of **7a**.

| Wavelength<br>(nm) | Oscillator<br>Strength | Major contributions              |
|--------------------|------------------------|----------------------------------|
| 581.239            | 0.4053                 | HOMO->LUMO (98%)                 |
| 444.962            | 0.1317                 | H-2->LUMO (33%), H-1->LUMO (58%) |
| 424.052            | 0.0624                 | H-2->LUMO (56%), H-1->LUMO (34%) |
| 406.519            | 0.0028                 | H-3->LUMO (55%), HOMO->L+1 (31%) |
| 383.804            | 0.7462                 | H-3->LUMO (35%), HOMO->L+1 (55%) |

|         |        |                                                                   |
|---------|--------|-------------------------------------------------------------------|
| 364.177 | 0.0314 | H-6->LUMO (23%), H-5->LUMO (37%), HOMO->L+2 (26%)                 |
| 351.838 | 0.0382 | H-4->LUMO (92%)                                                   |
| 349.094 | 0.28   | H-5->LUMO (15%), HOMO->L+2 (69%)                                  |
| 343.971 | 0.029  | H-7->LUMO (86%)                                                   |
| 340.916 | 0.0114 | H-6->LUMO (59%), H-5->LUMO (38%)                                  |
| 330.695 | 0.1703 | HOMO->L+3 (86%)                                                   |
| 319.275 | 0.0043 | H-8->LUMO (92%)                                                   |
| 317.623 | 0.0151 | HOMO->L+4 (90%)                                                   |
| 316.230 | 0.0923 | H-1->L+1 (86%)                                                    |
| 313.060 | 0.0466 | H-2->L+1 (93%)                                                    |
| 303.630 | 0.0706 | H-9->LUMO (13%), HOMO->L+5 (14%), HOMO->L+6 (44%)                 |
| 302.703 | 0.004  | H-10->LUMO (69%), HOMO->L+8 (18%)                                 |
| 301.269 | 0.0159 | H-9->LUMO (68%), HOMO->L+6 (16%)                                  |
| 297.239 | 0.0192 | H-11->LUMO (84%), H-3->L+1 (10%)                                  |
| 295.123 | 0.0875 | H-11->LUMO (11%), H-3->L+1 (77%)                                  |
| 294.920 | 0.021  | HOMO->L+5 (64%), HOMO->L+6 (24%)                                  |
| 292.533 | 0.0587 | H-1->L+2 (13%), HOMO->L+7 (34%), HOMO->L+8 (11%), HOMO->L+9 (10%) |
| 291.831 | 0.3195 | H-1->L+2 (43%)                                                    |
| 290.811 | 0.0089 | H-10->LUMO (14%), HOMO->L+8 (42%), HOMO->L+9 (24%)                |
| 290.545 | 0.0096 | H-15->LUMO (41%), HOMO->L+9 (25%)                                 |
| 289.974 | 0.0204 | H-15->LUMO (26%), HOMO->L+7 (30%), HOMO->L+8 (14%)                |
| 287.893 | 0.0305 | H-2->L+2 (55%), H-1->L+2 (19%)                                    |
| 286.907 | 0.0553 | H-16->LUMO (57%), H-15->LUMO (11%), H-2->L+2 (15%)                |
| 285.533 | 0.0448 | H-14->LUMO (34%), H-13->LUMO (11%), HOMO->L+10 (19%)              |

|         |        |                                                                                |
|---------|--------|--------------------------------------------------------------------------------|
| 283.263 | 0.0143 | H-12->LUMO (78%)                                                               |
| 280.717 | 0.0138 | H-2->L+3 (25%), H-1->L+3 (61%)                                                 |
| 279.741 | 0.0034 | H-13->LUMO (71%), HOMO->L+10 (12%)                                             |
| 278.835 | 0.0064 | H-14->LUMO (26%), HOMO->L+10 (21%), HOMO->L+11 (12%)                           |
| 274.569 | 0.073  | H-3->L+2 (30%), H-2->L+3 (44%)                                                 |
| 273.105 | 0.0143 | H-3->L+2 (41%), H-2->L+3 (14%), H-1->L+3 (13%)                                 |
| 272.679 | 0.019  | H-4->L+1 (69%), H-3->L+2 (10%)                                                 |
| 270.525 | 0.0277 | H-17->LUMO (10%), H-6->L+1 (15%), H-5->L+1 (33%), HOMO->L+11 (13%)             |
| 268.783 | 0.0329 | H-17->LUMO (18%), H-14->LUMO (10%), H-5->L+1 (20%), HOMO->L+11 (15%)           |
| 266.243 | 0.0027 | H-17->LUMO (48%), HOMO->L+11 (27%)                                             |
| 263.965 | 0.0062 | H-6->L+1 (56%), H-5->L+1 (31%)                                                 |
| 260.855 | 0.0209 | H-7->L+1 (30%), HOMO->L+12 (36%), HOMO->L+13 (12%)                             |
| 260.416 | 0.0283 | H-2->L+5 (28%), H-1->L+5 (55%)                                                 |
| 259.604 | 0.0284 | H-7->L+1 (23%), H-3->L+3 (18%), HOMO->L+12 (42%)                               |
| 259.186 | 0.0012 | H-7->L+1 (30%), H-3->L+3 (38%)                                                 |
| 258.327 | 0.021  | H-2->L+4 (23%), H-1->L+4 (62%)                                                 |
| 257.828 | 0.0478 | H-18->LUMO (23%), H-3->L+3 (12%), HOMO->L+13 (37%)                             |
| 255.627 | 0.0043 | H-2->L+6 (16%), H-2->L+7 (14%), H-1->L+6 (23%), H-1->L+7 (22%)                 |
| 253.500 | 0.0774 | H-2->L+5 (11%), H-1->L+5 (10%), H-1->L+6 (19%), H-1->L+7 (16%), H-1->L+9 (11%) |
| 252.231 | 0.006  | H-8->L+1 (53%), H-5->L+2 (22%)                                                 |

---

**Table S5.** S<sub>0</sub> optimized geometry of the compound **7a** at B3LYP/6-31G (d,p) level of theory and Empirical Dispersion GD2.

# Charge = 0

# Sum of imaginary frequencies= 0

# Total Energy (hartree) = -3650.687583

| Atom | X        | Y        | Z        | Atom | X        | Y        | Z        |
|------|----------|----------|----------|------|----------|----------|----------|
| S    | 2.13042  | -1.90302 | 0.34434  | H    | 4.58658  | -2.27875 | -1.10334 |
| S    | 1.13497  | -1.94182 | -0.00152 | C    | 3.87084  | -0.78687 | 0.24444  |
| S    | 4.29623  | 4.76021  | -2.23588 | C    | 0.52151  | -0.27610 | -3.43327 |
| O    | -9.95894 | -2.23034 | -0.95732 | H    | -0.34210 | -0.92531 | -3.32750 |
| N    | -3.14057 | 1.24877  | 0.75322  | C    | 2.55870  | -2.66829 | -0.68855 |
| N    | 3.57354  | 0.22279  | -0.64208 | C    | -3.43716 | -2.01005 | -1.87554 |
| H    | 3.39185  | 0.09207  | -1.62646 | H    | -4.21171 | -1.87099 | -2.62090 |
| O    | 6.40161  | -5.44115 | 3.78165  | C    | 3.59281  | 1.15224  | 1.37255  |
| C    | -0.01184 | 2.97602  | 0.27684  | H    | 3.54287  | 1.89123  | 2.16103  |
| H    | 0.47773  | 3.82041  | 0.75071  | C    | 2.79165  | 1.39974  | -3.66027 |
| C    | -3.25175 | 2.21570  | 1.75815  | H    | 3.66899  | 2.03184  | -3.74465 |
| C    | -5.20709 | 1.08513  | 1.68904  | C    | -1.36165 | 6.19991  | 4.55664  |
| H    | -6.18837 | 0.69254  | 1.91093  | H    | -1.17310 | 7.01307  | 5.25136  |
| C    | -4.54923 | 2.07772  | 2.35303  | C    | 1.49727  | -0.52743 | -4.40139 |
| H    | -4.91036 | 2.65258  | 3.19413  | H    | 1.38750  | -1.37834 | -5.06767 |
| C    | -4.33272 | 0.48979  | 0.68747  | C    | 0.82075  | -3.73265 | -1.83600 |
| C    | -1.38872 | 0.83873  | -1.05291 | H    | 0.36624  | -4.40507 | -2.55545 |
| H    | -1.91083 | 0.07260  | -1.60814 | C    | 3.89744  | -0.23281 | 1.50927  |
| C    | -8.65168 | -1.92499 | -0.73465 | H    | 4.10351  | -0.77753 | 2.41922  |
| C    | -1.25157 | 2.51287  | 0.75679  | C    | 2.22431  | -3.59206 | -1.64841 |
| C    | -1.92891 | 1.44672  | 0.07788  | H    | 2.96860  | -4.14974 | -2.20728 |
| C    | -2.10709 | 2.99217  | 1.81882  | C    | 5.91199  | -3.39995 | 0.82209  |
| C    | 0.53822  | 2.35110  | -0.82818 | H    | 6.52083  | -2.99966 | 0.01516  |

|   |          |          |          |   |          |          |          |
|---|----------|----------|----------|---|----------|----------|----------|
| C | -5.99171 | -1.07900 | -0.28005 | C | 2.61733  | 0.30520  | -4.52080 |
| C | -7.03294 | -0.14537 | -0.47768 | H | 3.36178  | 0.10006  | -5.28464 |
| H | -6.79769 | 0.91356  | -0.47961 | C | -2.90005 | 4.91521  | 3.19765  |
| C | -1.85027 | 4.09173  | 2.74557  | H | -3.90236 | 4.74896  | 2.81546  |
| C | -4.60071 | -0.64962 | -0.04916 | C | 6.50817  | -4.17568 | 1.80913  |
| C | 3.09728  | 2.70843  | -0.66241 | H | 7.57036  | -4.39737 | 1.78846  |
| H | 2.87656  | 3.43015  | 0.13408  | C | 5.73221  | -4.69006 | 2.85888  |
| C | 4.53856  | -3.12076 | 0.84830  | C | 3.77732  | -3.63874 | 1.89691  |
| C | -1.33389 | -2.61119 | -1.04329 | H | 2.71120  | -3.43982 | 1.93413  |
| C | -6.32317 | -2.44378 | -0.34430 | C | -10.3141 | -3.60797 | -1.02441 |
| H | -5.53963 | -3.18198 | -0.20869 | H | -9.78398 | -4.11423 | -1.84170 |
| C | -7.63087 | -2.87189 | -0.56386 | H | -11.3890 | -3.63444 | -1.21097 |
| H | -7.84573 | -3.93317 | -0.59483 | H | -10.0899 | -4.12147 | -0.08034 |
| C | -3.54162 | -1.47809 | -0.60408 | C | 4.35876  | -4.41889 | 2.90093  |
| C | -0.13214 | 1.28105  | -1.46610 | H | 3.73873  | -4.80795 | 3.69951  |
| C | 3.38246  | 1.40820  | 0.03252  | C | -0.55018 | 4.34770  | 3.22283  |
| C | 1.82023  | 2.68164  | -1.57059 | H | 0.26388  | 3.70081  | 2.91385  |
| H | 1.73231  | 3.68460  | -2.01052 | C | -2.65853 | 5.95313  | 4.09554  |
| C | 0.08171  | -2.90478 | -1.01690 | H | -3.48212 | 6.57945  | 4.42703  |
| C | 0.69503  | 0.81193  | -2.57511 | C | 6.42013  | 3.32444  | -2.44109 |
| C | 1.83538  | 1.63742  | -2.67542 | H | 7.41394  | 2.98075  | -2.70658 |
| C | -8.33941 | -0.55621 | -0.69340 | C | 5.90944  | 4.52603  | -2.84247 |
| H | -9.13509 | 0.16390  | -0.85465 | H | 6.37752  | 5.29046  | -3.44809 |
| C | 5.50745  | 2.57279  | -1.63565 | C | -0.31018 | 5.39183  | 4.11526  |
| H | 5.72287  | 1.59488  | -1.22315 | H | 0.69963  | 5.56850  | 4.47502  |
| C | 4.30867  | 3.20247  | -1.42917 | C | 5.64813  | -5.97494 | 4.86386  |
| C | -2.18739 | -2.62829 | -2.13149 | H | 6.35590  | -6.52987 | 5.48244  |
| H | -1.88014 | -2.99753 | -3.10344 | H | 4.86130  | -6.65219 | 4.50535  |
| C | 3.93145  | -2.22154 | -0.22242 | H | 5.18529  | -5.17618 | 5.45869  |

---

**References:**

- 1) A. Kumar, K. G. Thorat, A. Sinha, R. J. Butcher and M. Ravikanth, Meso-Fused Carbatriphyrins(2.1.1) and Its Organo Phosphorus(V) Complex, *J. Org. Chem.*, 2019, **84**, 9067-9074.
- 2) A. Srinivasan, V. M. Reddy, S. J. Narayanan, B. Sridevi, S. K. Pushpan, M. Ravikumar and T. K. Chandrashekar, Tetrathia- and Tetraoxarubyrins: Aromatic, Core-Modified, Expanded Porphyrins, *Angew. Chem. Int. Ed.*, 1997, **36**, 2598-2601.
- 3) L. Ziegler, B. Chaudry and H. Chaudry, Gold-Catalyzed Organic Transformations, *Chem. Rev.*, 2008, **108**, 3239-3265.
- 4) O. V. Dolomanov, L. J. Bourhis, R. J. Gildea, J. A. K. Howard and H. Puschmann, OLEX2: a complete structure solution, refinement and analysis program, *J. Appl. Cryst.*, 2009, **42**, 339-341.
- 5) G. M. Sheldrick SHELXT – Integrated space-group and crystalstructure determination, *Acta Cryst. A*, 2015, **71**, 3-8.
- 6) I. Usón and G. M. Sheldrick, An introduction to experimental phasing of macromolecules illustrated by SHELX; new autotracing features, *Acta Cryst. C*, 2015, **71**, 3-8.
- 7) A. D. Becke Density-functional thermochemistry. III. The role of exact exchange, *J. Chem. Phys.*, 1993, **98**, 5648-5652.
- 8) S. Grimme, A. Hansen, J. G. Brandenburg and C. Bannwarth, Dispersion-Corrected Mean-Field Electronic Structure Methods, *Chem. Rev.*, 2016, **116**, 5105–5154.
- 9) R. Bauernschmitt and R. Ahlrichs, Treatment of Electronic Excitations within the Adiabatic Approximation of Time Dependent Density Functional Theory, *Chem. Phys. Lett.*, 1996, **256**, 454-464.

- 10) J. Tomasi, B. Mennucci and R. Cammi, Quantum Mechanical Continuum Solvation Models.  
*Chem. Rev.*, 2005, **105**, 2999-3094.
